# Supplementary material for: A new strategy to reduce allelic bias in RNA-Seq readmapping
Source: PubMed Central journal article supplement — Nucleic Acids Res. 2012 May 14;40(16):e127. doi: 10.1093/nar/gks425 (PMC3439884; doi:10.1093/nar/gks425), 2012-05-14
Supplement: supp_gks425_Vijaya_satya_nar_supplementary_data_v4.pdf [file supp_gks425_Vijaya_satya_nar_supplementary_data_v4.pdf]

# Supplementary Data for “A new strategy to reduce allelic bias in RNA-Seq read-mapping”

Ravi Vijaya Satya\*, Nela Zavaljevski, and Jaques Reifman\*

DoD Biotechnology High Performance Computing Software Applications Institute, Telemedicine and Advanced Technology Research Center, US Army Medical Research and Materiel Command, Fort Detrick, MD 21702, USA

\*Corresponding authors: rvijaya@bhsai.org, jaques.reifman@us.army.mil

## 1. Construction of the enhanced reference

Our approach to construct the enhanced reference assumes a fixed read length  $r$ . If read lengths are variable, the shorter reads will map to multiple segments within the enhanced reference, resulting in lower mapping quality.

### 1.1 Objectives in constructing the enhanced reference

The following are the main design principles used in the construction of the enhanced reference:

Objective 1: The enhanced reference should contain all possible haplotypes within any length- $r$  window of the genome. This guarantees that all possible reads from any individual have an exact match within the enhanced reference. It ensures that all possible error-free reads from that region of the genome are equally likely to be mapped irrespective of whether they carry the reference alleles, non-reference alleles, or any combination of both. If an  $r$ -window contains a single polymorphic locus, this results in adding just one enhanced segment (Fig. 1A in the main text). Conversely, if there are  $k$  polymorphic loci within the  $r$ -window, this will result in the addition of  $2^k - 1$  enhanced segments.

Objective 2: Within any window of length  $\geq r$ , none of the added segments in the enhanced reference should be identical within themselves or with the original reference genome. This is necessary for two reasons: 1) to ensure that the length of the added segments is kept to a minimum, and 2) to eliminate avoidable scenarios in which a read matches two different segments of the enhanced reference equally well, thereby reducing the perceived mapping quality of the read.

### 1.2 Approach

In any window of length  $r$  with  $k$  polymorphic loci, the total number of haplotypes possible is  $2^k$ , assuming that there are only two possible alleles at each locus. Therefore, to ensure that all possible haplotypes are represented in the enhanced reference, we need to add  $2^k - 1$  segments to the original genome to build a complete enhanced reference. For simplicity in illustration, we can represent the two alleles at each locus with ‘0’ and ‘1’, where ‘0’ indicates the reference allele and ‘1’ indicates the non-reference allele. Fig. S1 shows a scenario with 3 polymorphic loci within an  $r$ -window. The 8 possible haplotypes within this window are {000,001,010,011,100,101,110,111}. By definition, the reference genome carries the haplotype 000. Fig. S1B shows the remaining 7 haplotypes missing from the reference. Including segments of length  $r-1$  on either side of each of these haplotypes ensures that any  $r$ -window overlapping any of the haplotypes is part of an enhanced segment. Fig. S1B shows these

haplotypes extended by  $r-1$  on either side. While these segments satisfy Objective 1, they do not satisfy Objective 2: specifically, Fig. S1B shows two instances in which regions of length greater than  $r$  are identical between segments. For instance, the reference genome and the segment containing the haplotype 100 are identical to the right of  $S_1$ .

To satisfy Objective 2, we need to exclude the redundant regions while making sure that Objective 1 is still satisfied. There are many possible ways of achieving this: Fig. S1C shows only one of the possible solutions. In the example above, the segment containing haplotype 100 extends only  $r-1$  bases to the right of  $S_1$ , thereby ensuring that it is not identical to the reference genome in any  $r$ -window.

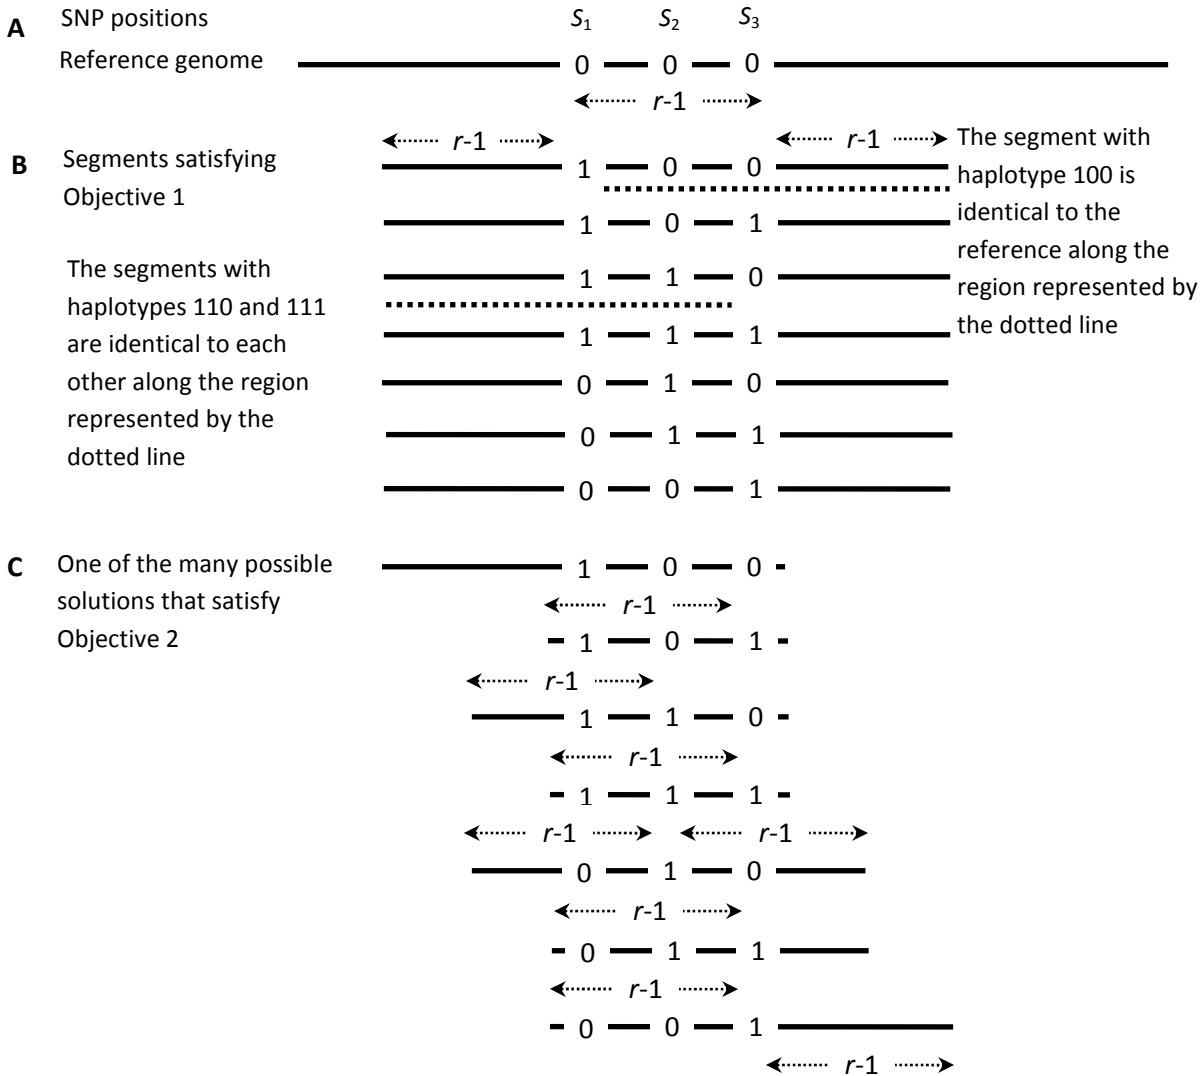

**Fig. S1.** An instance with three SNPs within a single  $r$ -window. The symbol ‘0’ indicates the reference allele and ‘1’ indicates the non-reference allele. (A) The reference genome contains the haplotype ‘000’ by definition. (B) The seven possible remaining haplotypes. (C) One of the many possible solutions for adding enhanced segments that satisfy both objectives.

### 1.3 Algorithm

The solution presented in Fig. S1C can be formalized and generalized for  $k$  polymorphic loci using a greedy algorithm. This algorithm scans the reference genome from left to right. At each polymorphic locus, the algorithm adds all the necessary segments that carry the non-reference allele at that locus. For instance, the solution shown in Fig. S1C is built by adding segments with haplotypes {100, 101, 110, and 111} at  $S_1$ , {010 and 011} at  $S_2$ , and {001} at  $S_3$ . Fig. S2 gives a high-level description of this algorithm.

---

**Procedure** *build\_enhanced\_reference*

---

**Inputs:** Reference genome  $G$ , sorted list of polymorphic loci  $S$ , maximum read length  $r$

**Output:** Enhanced reference  $G_e$

$G_e \leftarrow G$

**for**  $i$  from 1 to  $|S|$

$Pos \leftarrow S(i)$

$K \leftarrow$  number of SNPs in the window  $G[Pos, Pos+r-1]$

$V \leftarrow$  list of all possible  $2^{k-1}$  binary vectors of length  $k$  such that for each  $v \in V$ ,  $v[0]=1$

**for** each  $v \in V$

$start \leftarrow S(i + \max\{j \mid v[j]=1\}) - r + 1$

$end \leftarrow Pos + r - 1$

$E \leftarrow G[start, end]$

**for** each  $j \mid v[j]=1$

$E[S(i+j)-start] \leftarrow \text{NonRef}(S(i+j))$

**end for**

$G_e \leftarrow G_e \cup E$

**end for**

**end for**

---

**Fig. S2.** Algorithm for constructing the enhanced reference.

Lemma 1 below proves that the procedure *build\_enhanced\_reference* satisfies Objective 1, and Lemma 2 proves that it satisfies Objective 2.

*Lemma 1:* Every possible haplotype within any  $r$ -window is part of the original reference genome or an enhanced segment added by the algorithm.

*Proof.* Consider any window  $W[i, i+r-1]$  of length  $r$ . By definition, the reference genome consists of the haplotype in which each SNP is '0'. Let  $H$  be a haplotype within  $W$  with at least one SNP  $S$  such that  $H[S]=1$ . We will show that  $H$  will be a part of an enhanced segment added by the algorithm. Let  $S_l$  be the left most SNP in  $W$  such that  $H[S_l]=1$ , and  $S_m$  be the right most SNP in  $W$  such that  $H[S_m]=1$ . By definition,  $H[S_p]=0$  for every SNP  $S_p$  such that  $i \leq S_p < S_l$  and every SNP  $S_p$  such that  $S_m < S_p \leq (i+r-1)$ . When the algorithm reaches  $S_l$ , it adds an enhanced segment for each haplotype in the window  $[S_l, S_l+r-1]$ . Therefore, it includes an enhanced segment  $E$  such that  $E[S_l]=1$ ,  $E[S_m]=1$ ,  $E[S_k]=H[S_k] \forall \{S_k \mid S_l \leq S_k \leq S_m\}$ , and  $E[S_p]=0$  for all other SNPs within  $E$ . Hence,  $E$  is identical to  $H$  in every SNP position. Now, it is enough to show that  $E$  covers the entire window  $W$ . According to the algorithm, the left end of  $E$  will be

$(S_m-r+1)$ . Since  $S_m \leq (i+r-1)$  by definition,  $i \geq (S_m-r+1)$ , and hence  $E$  covers the left end of  $W$ . The right end of  $E$  is  $(S_l+r-1)$ . Since  $S_l \geq i$ ,  $(S_l+r-1) \geq (i+r-1)$ , and  $E$  covers the right of  $W$ . Hence the haplotype  $H$  will be covered by the enhanced segment  $E$ .  $\diamond$

*Lemma 2:* In any  $r$ -window, an enhanced segment added by the algorithm is neither identical to the reference nor identical to any other enhanced segment.

*Proof:* It can be trivially shown that each enhanced segment added by the algorithm is different from the original reference in any  $r$ -window. We will show by contradiction that no two enhanced segments can be identical in an  $r$ -window. Let us assume that there are two enhanced segments  $E_1$  and  $E_2$  that are identical in an  $r$ -window  $W[i, i+r-1]$ . Let  $S_l$  be the left most SNP in  $W$  such that  $E_1[S_l]=E_2[S_l]=1$ , and  $S_m$  be the right most SNP in  $W$  such that  $E_1[S_m]=E_2[S_m]=1$ . Let us also assume that  $E_1$  was added by the algorithm at a SNP  $S_1$  and  $E_2$  at a SNP  $S_2$ . Since  $E_l[S_p]=0$  for any SNP  $S_p < S_1$ , we know that  $S_l \geq S_1$ . Similarly, we also know that  $S_l \geq S_2$ . Also,  $S_m - S_l \leq (r-1)$  and  $S_m - S_2 \leq (r-1)$ , since  $E_1[S_m]$  or  $E_2[S_m]$  cannot be '1' otherwise.

*Case 1:*  $S_1=S_2$ . If  $S_1$  and  $S_2$  are the same SNP, then  $S_1=S_2=S_l$  by definition. This is not possible, since the algorithm only adds one enhanced segment for each haplotype at any SNP, and hence  $E_1$  and  $E_2$  will be different for at least one SNP within  $W$ .

*Case 2:*  $S_1 < S_2$ . The right end of  $E_1$  will be  $(S_1+r-1)$ , and the right end of  $E_2$  will be  $(S_2+r-1)$ . However,  $i > S_1$ , since  $E_l[S_l]=1$  and  $E_2[S_l]=0$ , and  $E_1$  and  $E_2$  will not be identical within  $W$  otherwise. But, if  $i > S_1$ ,  $E_1$  and  $E_2$  can overlap in at most  $r-1$  bases, as  $E_1$  ends at  $(S_1+r-1)$ . Hence,  $E_1$  and  $E_2$  cannot be identical in an  $r$ -window.

*Case 3:*  $S_1 < S_2$ . Similar to *Case 2*.  $E_1$  and  $E_2$  cannot be identical in an  $r$ -window.

Hence, our initial assumption is wrong. There can be no two enhanced segments that are identical in an  $r$ -window.  $\diamond$

## 1.4 Limitations and assumptions

The algorithm makes the following assumptions:

- *Each SNP position is bi-allelic:* The great majority (>99.99%) of the common SNPs in the human genome have only two known alleles. Therefore, this assumption does not limit the effectiveness of the algorithm, in practice.
- *All the reads have the same fixed read length  $r$ :* The algorithm can still be used even if the read lengths are variable; in that case  $r$  should be set to the maximum possible read length. In this case, Objective 2 will not be satisfied. However, this will have a very minimal impact on the ability to map any read, since all possible haplotypes are present in the enhanced reference. The only negative impact is that reads shorter than  $r$  can then have an exact match with multiple segments in the enhanced reference. This results in a lower mapping quality for these reads.
- *The number of SNPs within any  $r$ -window is bound by a constant:* The number of possible haplotypes within a window increases exponentially with the number of polymorphic loci within the window. Therefore, this approach is only practical when the number of polymorphic loci within an  $r$ -window is much smaller than  $r$ , ideally not more than 5 or 6. This, in fact, is the case in the human genome. In the very few instances where there are a large number of possible SNPs within an  $r$ -window, we can

take the first few SNPs and ignore the remaining ones while constructing the enhanced segments at any position.

## 2. Results on simulated reads

### 2.1 Mapping statistics for simulated reads with mapping qualities ignored

The following figures and tables provide detailed results for the simulated reads mapped using MAQ and BWA. These figures are only intended to compare the effect of the three alternative reference construction strategies in accurately identifying allele-specific expression. These results are not intended to compare the performance of the MAQ and BWA programs. In obtaining these results, BWA was run with default settings, while some of the default settings for the MAQ program were modified as described in the main text.

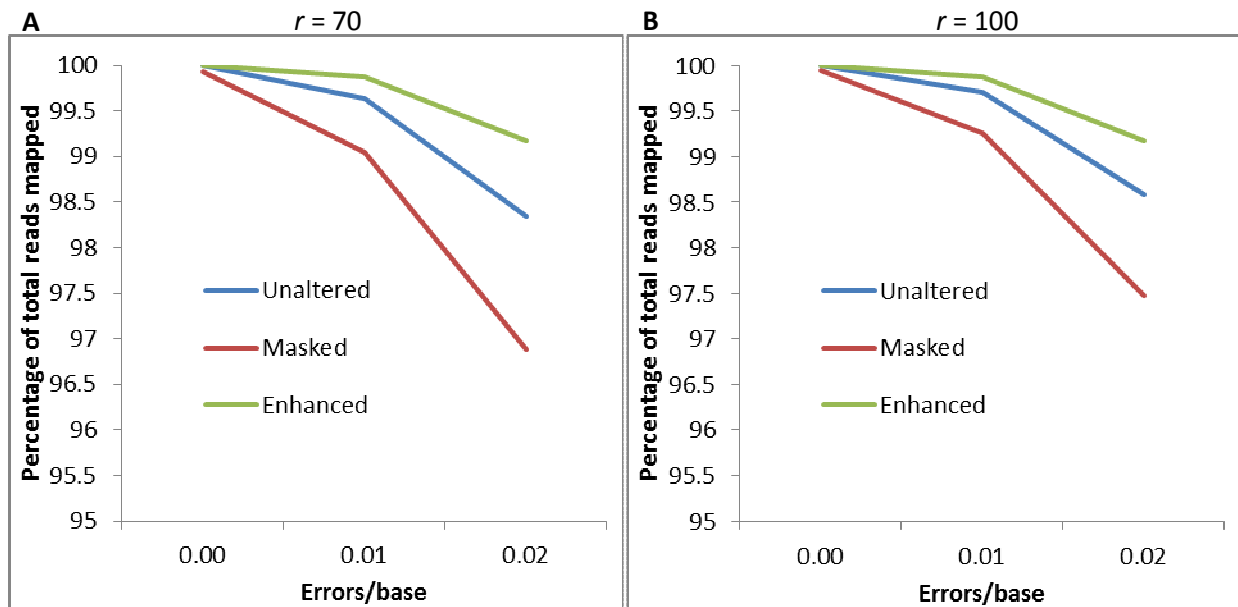

**Fig. S3.** Percentage of simulated reads that could be mapped using MAQ to each of the three references for: (A) read length 70 and (B) read length 100. The enhanced reference approach consistently outperforms the other two approaches.

**A** Bias for reads mapped to the reference

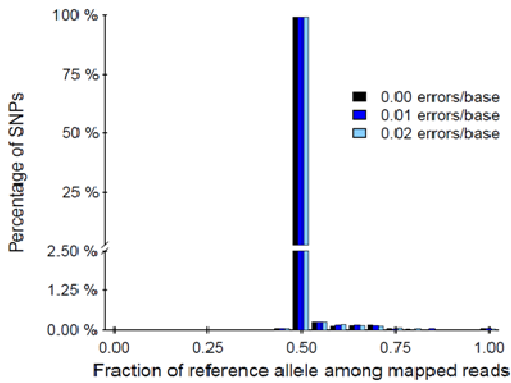

**B** Bias for reads mapped to the SNP-masked reference

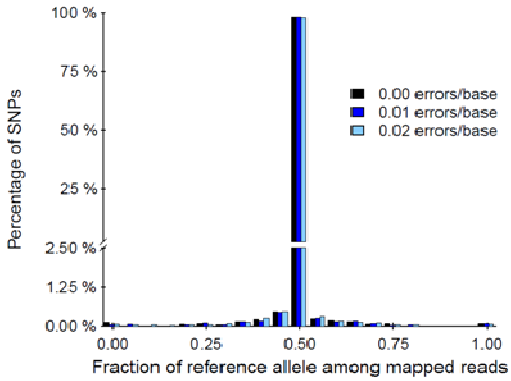

**C** Bias for reads mapped to the enhanced reference

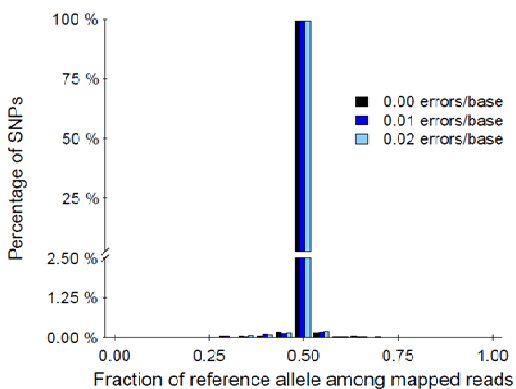

**Fig. S4.** Read-mapping biases for simulated 70-bp reads mapped using MAQ. (A) Mapping against the unaltered reference shows that there is significant bias towards the reference allele (*i.e.*, to the right). (B) Mapping against the masked reference results in many loci that are biased in both directions. (C) Mapping against the enhanced reference reduces the number of biased loci.

**A** Bias for reads mapped to the reference

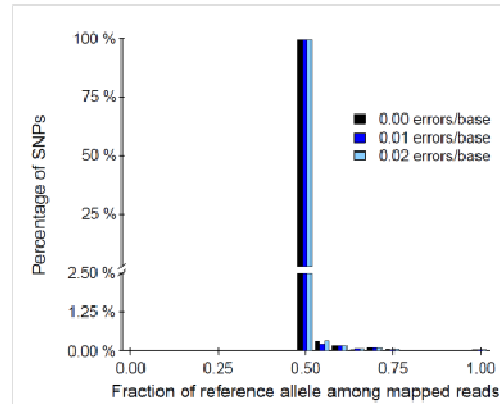

**B** Bias for reads mapped to the SNP-masked reference

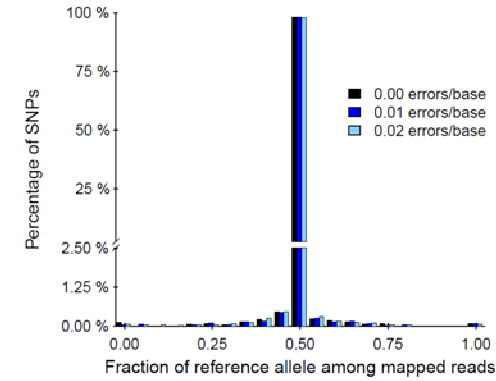

**C** Bias for reads mapped to the enhanced reference

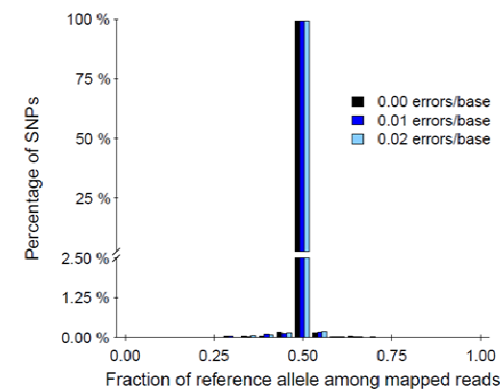

**Fig. S5.** Read-mapping biases for simulated 100-bp reads mapped using MAQ. (A) Mapping against the unaltered reference shows that there is significant bias towards the reference allele (*i.e.*, to the right). (B) Mapping against the masked reference results in many loci that are biased in both directions. (C) Mapping against the enhanced reference reduces the number of biased loci.



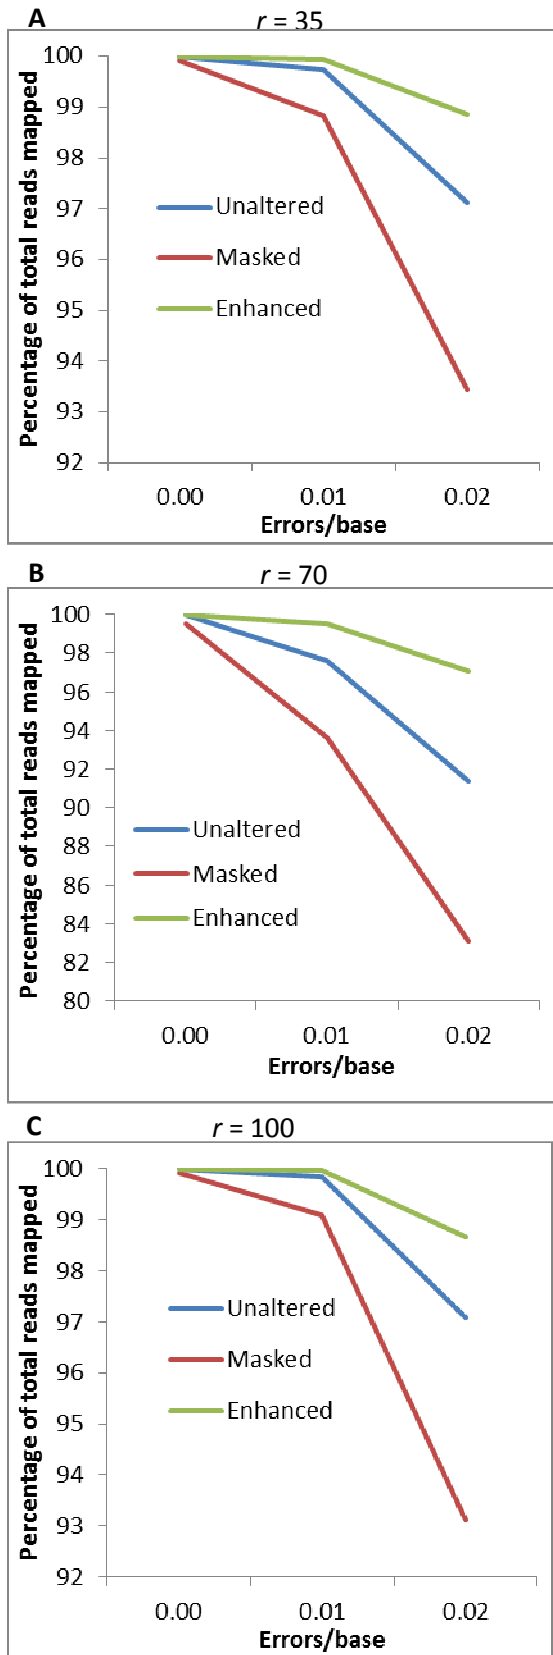

**Fig. S7.** Percentages of simulated reads that could be mapped using BWA for different read lengths.

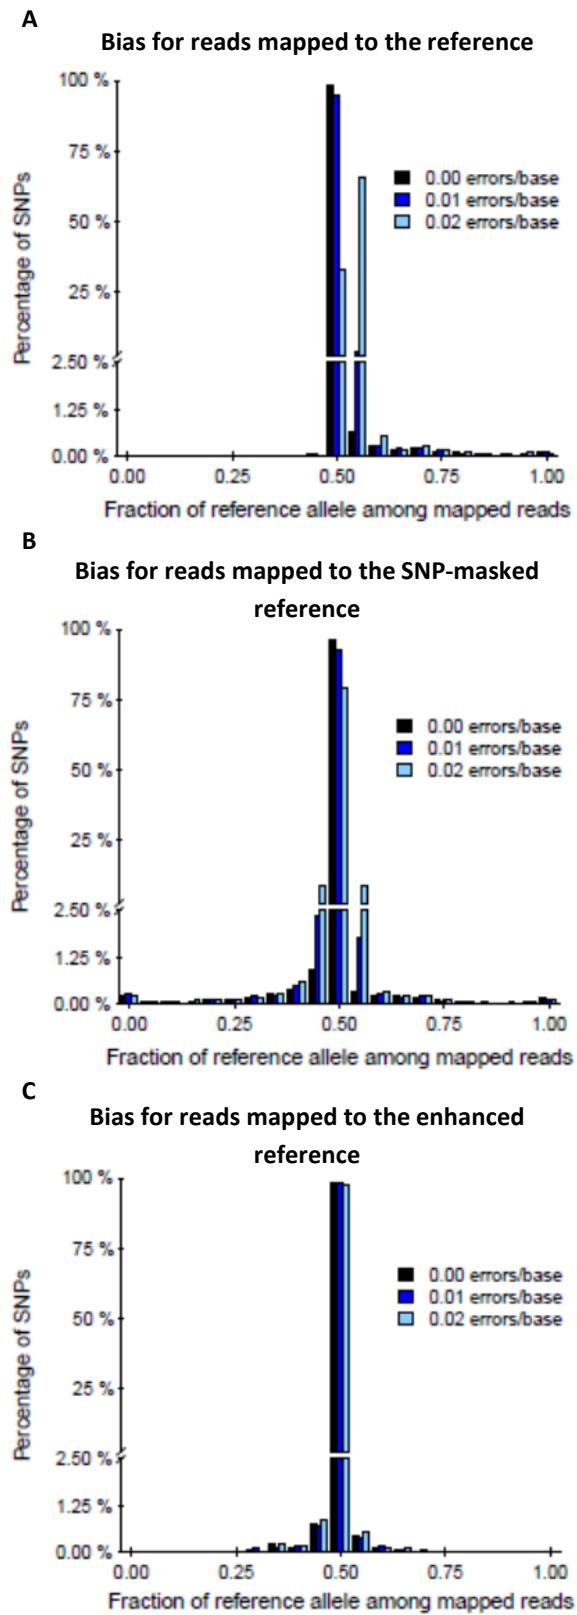

**Fig. S8.** Read-mapping biases for simulated 35-bp reads mapped using BWA.



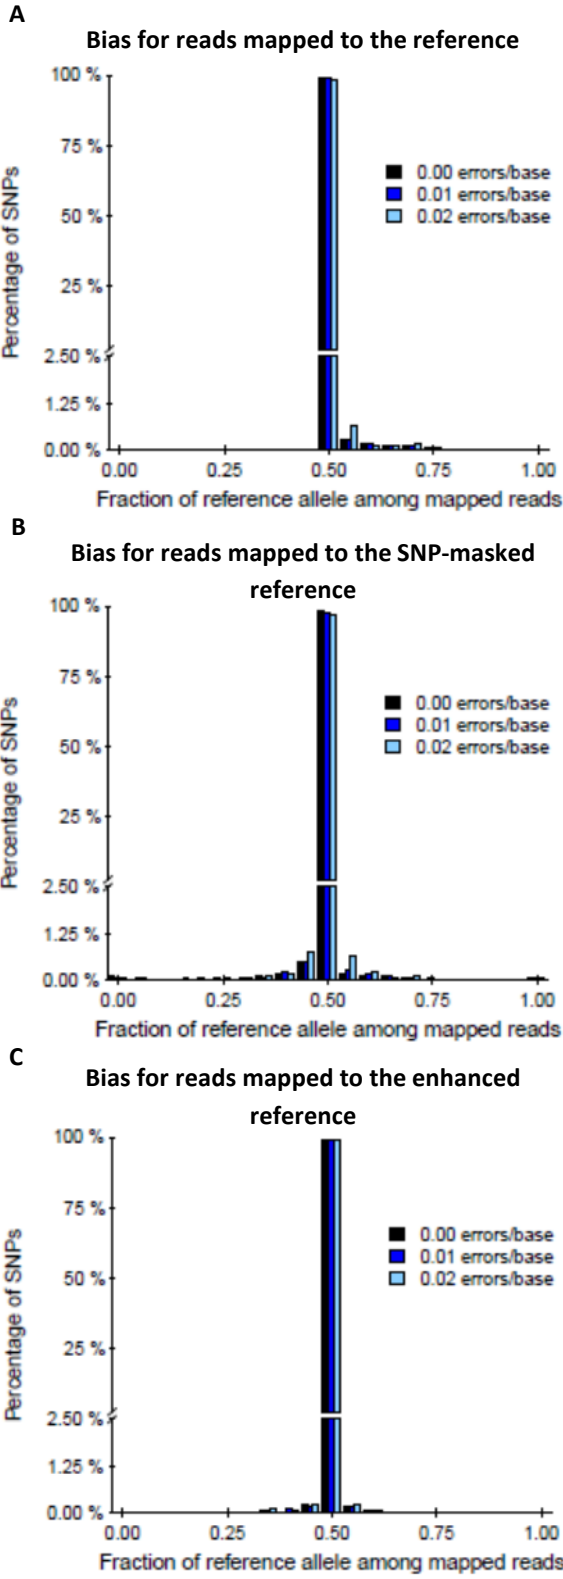

**Fig. S9.** Read-mapping biases for simulated 70-bp reads mapped using BWA.

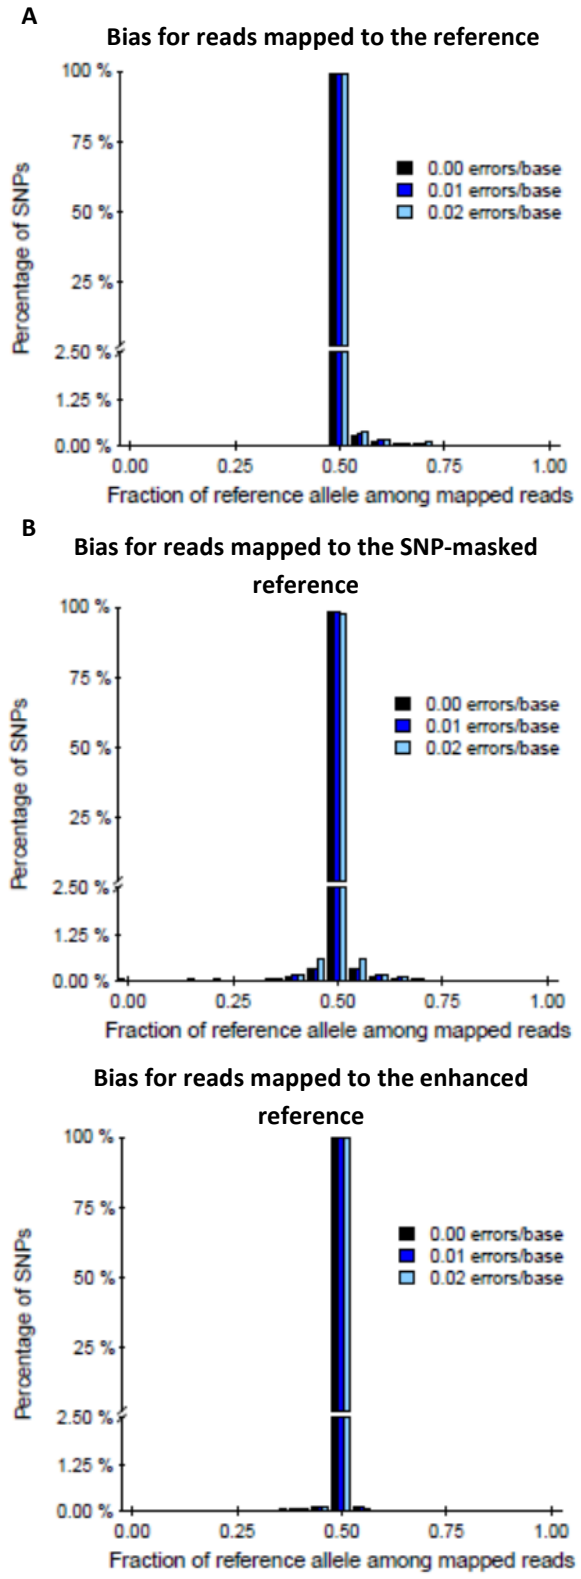

**Fig. S10.** Read-mapping biases for simulated 100-bp reads mapped using BWA.

**Table S1.** The numbers of biased loci (*i.e.*, loci showing a difference in the proportions of the mapped reads) when equal numbers of simulated reads from each allele were mapped using the three methods. The difference in the frequencies of the two alleles in the mapped reads is given by  $\Delta p$ .  $\Delta p \geq 10\%$  implies that  $\geq 55\%$  of the mapped reads carry one allele while  $\leq 45\%$  carry the other. Similarly,  $\Delta p \geq 5\%$  implies that  $\geq 52.5\%$  of the mapped reads carry one allele while  $\leq 47.5\%$  carry the other. The enhanced reference approach consistently outperforms the other two methods, keeping the numbers of biased loci low even at the higher error rates. The numbers from BWA mappings are very similar to the ones from MAQ mappings, except for slightly biased loci in case of longer reads with high error rates. These differences between the MAQ mappings and BWA mappings are likely due to the different settings used to run these programs. However, it is interesting to notice that these differences are minimal for the enhanced reference method, which shows that the enhanced reference method is able to handle these reads better than the other two methods.

| <b>MAQ</b>          | <b><math>\Delta p \geq 10\%</math></b> |             |             | <b><math>\Delta p \geq 5\%</math></b> |             |             | <b><math>\Delta p \geq 2\%</math></b> |             |             |
|---------------------|----------------------------------------|-------------|-------------|---------------------------------------|-------------|-------------|---------------------------------------|-------------|-------------|
| <b>Errors/base</b>  | <b>0.00</b>                            | <b>0.01</b> | <b>0.02</b> | <b>0.00</b>                           | <b>0.01</b> | <b>0.02</b> | <b>0.00</b>                           | <b>0.01</b> | <b>0.02</b> |
| <b><i>r=35</i></b>  |                                        |             |             |                                       |             |             |                                       |             |             |
| Unaltered           | 141                                    | 156         | 986         | 194                                   | 498         | 6312        | 268                                   | 5025        | 8950        |
| Masked              | 319                                    | 364         | 467         | 396                                   | 669         | 2033        | 462                                   | 3392        | 5478        |
| Enhanced            | 116                                    | 114         | 115         | 178                                   | 188         | 197         | 248                                   | 322         | 2162        |
| <b><i>r=70</i></b>  |                                        |             |             |                                       |             |             |                                       |             |             |
| Unaltered           | 72                                     | 71          | 74          | 89                                    | 91          | 91          | 124                                   | 128         | 779         |
| Masked              | 159                                    | 161         | 161         | 204                                   | 197         | 206         | 250                                   | 296         | 730         |
| Enhanced            | 40                                     | 41          | 39          | 63                                    | 64          | 65          | 110                                   | 106         | 116         |
| <b><i>r=100</i></b> |                                        |             |             |                                       |             |             |                                       |             |             |
| Unaltered           | 49                                     | 49          | 52          | 67                                    | 64          | 72          | 86                                    | 85          | 268         |
| Masked              | 103                                    | 106         | 105         | 144                                   | 145         | 142         | 177                                   | 193         | 337         |
| Enhanced            | 24                                     | 26          | 26          | 41                                    | 43          | 40          | 63                                    | 73          | 77          |
| <b>BWA</b>          |                                        |             |             |                                       |             |             |                                       |             |             |
| <b><i>r=35</i></b>  |                                        |             |             |                                       |             |             |                                       |             |             |
| Unaltered           | 143                                    | 156         | 972         | 189                                   | 494         | 6304        | 255                                   | 5029        | 8948        |
| Masked              | 320                                    | 368         | 472         | 396                                   | 669         | 2020        | 469                                   | 3394        | 5486        |
| Enhanced            | 118                                    | 121         | 118         | 186                                   | 182         | 211         | 288                                   | 373         | 2215        |
| <b><i>r=70</i></b>  |                                        |             |             |                                       |             |             |                                       |             |             |
| Unaltered           | 71                                     | 78          | 78          | 87                                    | 91          | 126         | 117                                   | 128         | 3820        |
| Masked              | 163                                    | 159         | 165         | 195                                   | 206         | 275         | 244                                   | 357         | 1759        |
| Enhanced            | 41                                     | 41          | 41          | 67                                    | 64          | 70          | 115                                   | 116         | 179         |
| <b><i>r=100</i></b> |                                        |             |             |                                       |             |             |                                       |             |             |
| Unaltered           | 49                                     | 48          | 57          | 64                                    | 70          | 80          | 82                                    | 86          | 3371        |
| Masked              | 101                                    | 107         | 103         | 145                                   | 151         | 197         | 181                                   | 236         | 1370        |
| Enhanced            | 23                                     | 26          | 25          | 40                                    | 42          | 39          | 71                                    | 71          | 88          |

## 2.2 Mapping statistics for simulated reads that are mapped with mapping quality >0

The enhanced reference approach is designed to ensure that any read uniquely matches either the reference sequence or one of the enhanced segments corresponding to the window in the reference that the read came from (provided there are no other regions in the reference that are highly similar to this window). However, by design, each enhanced segment is 1-mismatch away from either the reference or other enhanced segments. This guarantees that any read mapping to an enhanced segment or reference window corresponding to an enhanced segment with  $d$  mismatches will also have at least one other hit with  $d+1$  mismatches. This inevitably reduces the mapping quality score of a read that maps to an enhanced segment or the corresponding window in the reference. In theory, the mapping quality, although reduced, should still be >0, as the read should still have a single best match. However, we find that the

mapping quality computations vary significantly from program to program, and some programs might assign a mapping quality of zero even when the read has a single best match. Specifically, the mapping quality computed by MAQ is zero in many instances when the read has one perfect hit and one 1-mismatch hit, as in the following instance:

```
-----
rs3855952_chr1_77689_REF_-_A_0 16
gi|89161185|ref|NC_000001.9|NC_000001 77590 0 100M * 0
0
CCTGATGGCAGAGAAGCAAACACCAGTCGGAGAGCTGGGGTCCTCCAGCCCTCTTGGCCCTGTG
GCCAATTTTTTCTTCAATAGCCTCATAAAATCACA
BBBBBBBBBBBBBBBBBBBBBBBBBBBBBBBBBBBBBBBBBBBBBBBBBBBBBBBBBBBBBBBB
BBBBBBBBBBBBBBBBBBBBBBBBBBBBBBBBBBBBBBBB MF:i:0 NM:i:0 UQ:i:0
H0:i:1 H1:i:1
-----
```

In the above alignment in SAM format, the underlined zero indicates the mapping quality. The entry “H0:i:1” indicates that the read has one perfect hit and “H1:i:1” indicates that the read has one 1-mismatch hit.

However, the same read is assigned a mapping quality score of 23 when mapped using BWA:

```
-----
rs3855952_chr1_77689_REF_-_A_0 16
gi|89161185|ref|NC_000001.9|NC_000001 77590 23 100M = 77590
0
CCTGATGGCAGAGAAGCAAACACCAGTCGGAGAGCTGGGGTCCTCCAGCCCTCTTGGCCCTGTG
GCCAATTTTTTCTTCAATAGCCTCATAAAATCACA
BBBBBBBBBBBBBBBBBBBBBBBBBBBBBBBBBBBBBBBBBBBBBBBBBBBBBBBBBBBBBBBB
BBBBBBBBBBBBBBBBBBBBBBBBBBBBBBBBBBBBBBBB XT:A:U NM:i:0 X0:i:1
X1:i:1 XM:i:0 XO:i:0 XG:i:0 MD:Z:100
-----
```

Figures S11 through S16 show the read-mapping biases when reads with mapping quality of zero were eliminated. Table S2 shows the number of biased loci at different levels of bias. All three approaches resulted in more biased loci than when the mapping qualities were ignored (Table S1). The enhanced reference approach still outperformed the other two approaches, producing the least number of biased loci in most cases. Figures S11, S13, and S15 show that the mapping qualities computed by MAQ negatively affect the performance of the enhanced reference approach. Figures S12, S14, and S16 show that mapping qualities computed by BWA do not have such a negative effect.

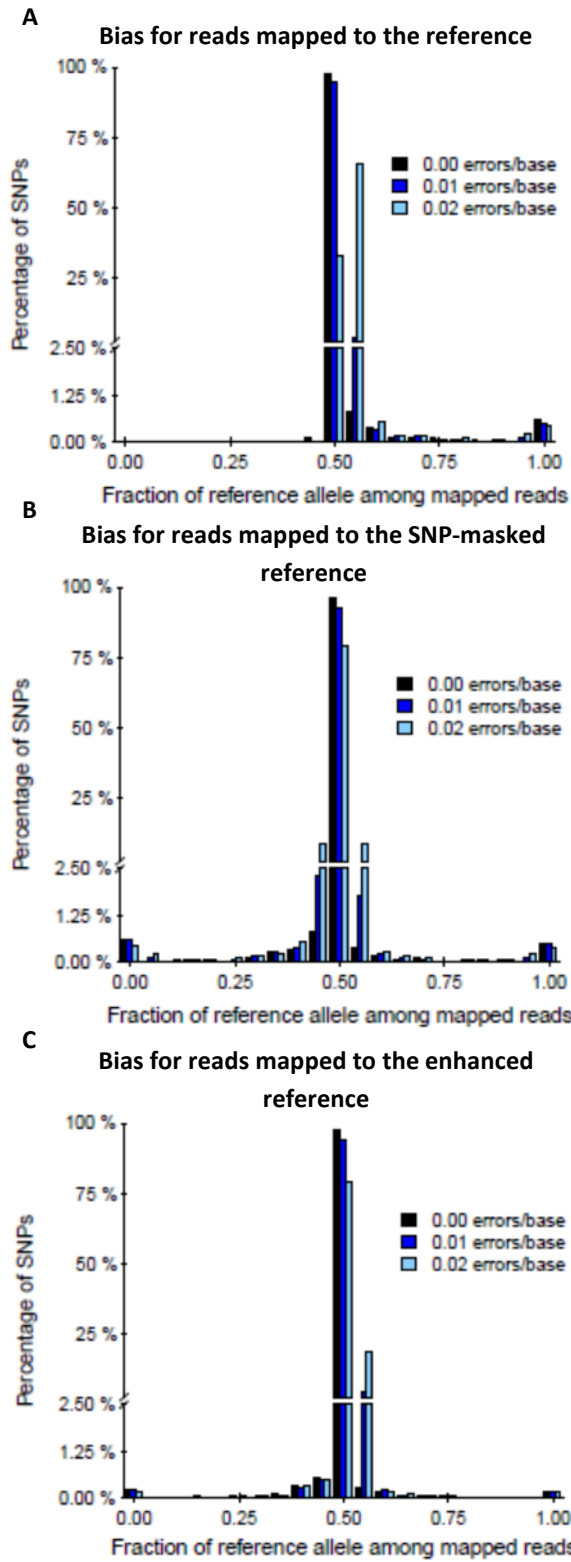

**Fig. S11.** Read-mapping biases for simulated 35-bp reads mapped using MAQ with mapping quality > 0.

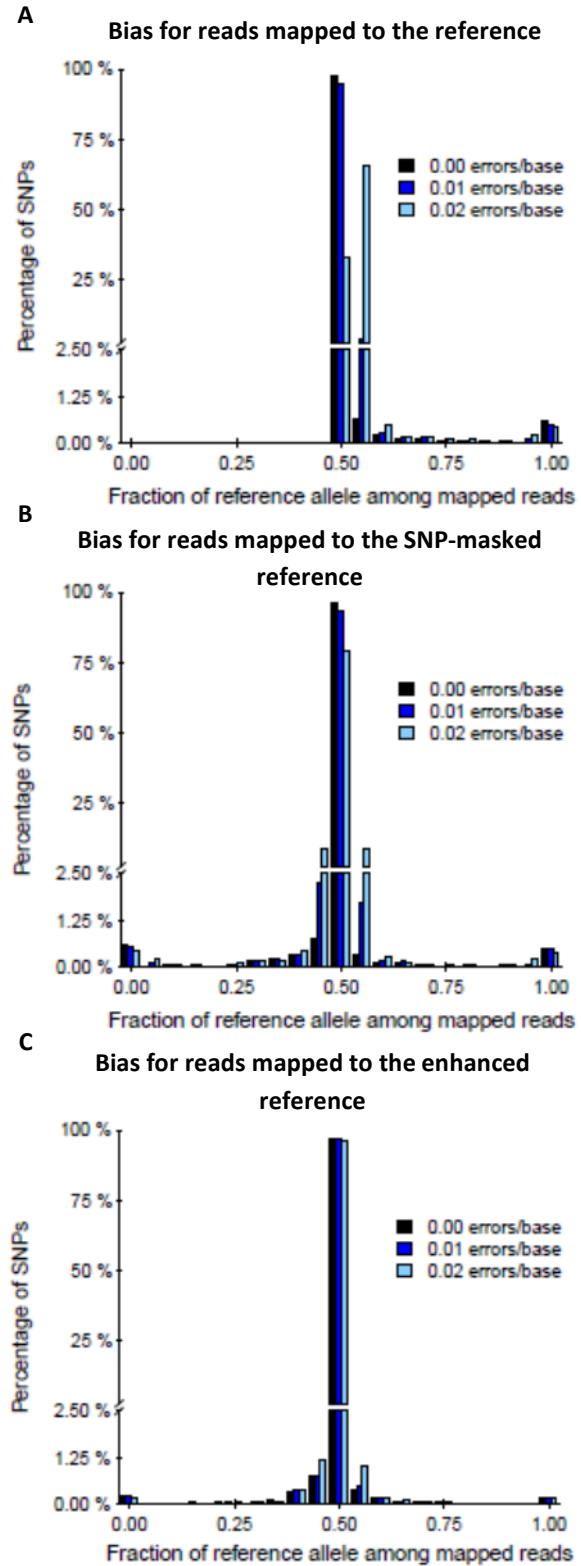

**Fig. S12.** Read-mapping biases for simulated 35-bp reads mapped using BWA with mapping quality > 0.

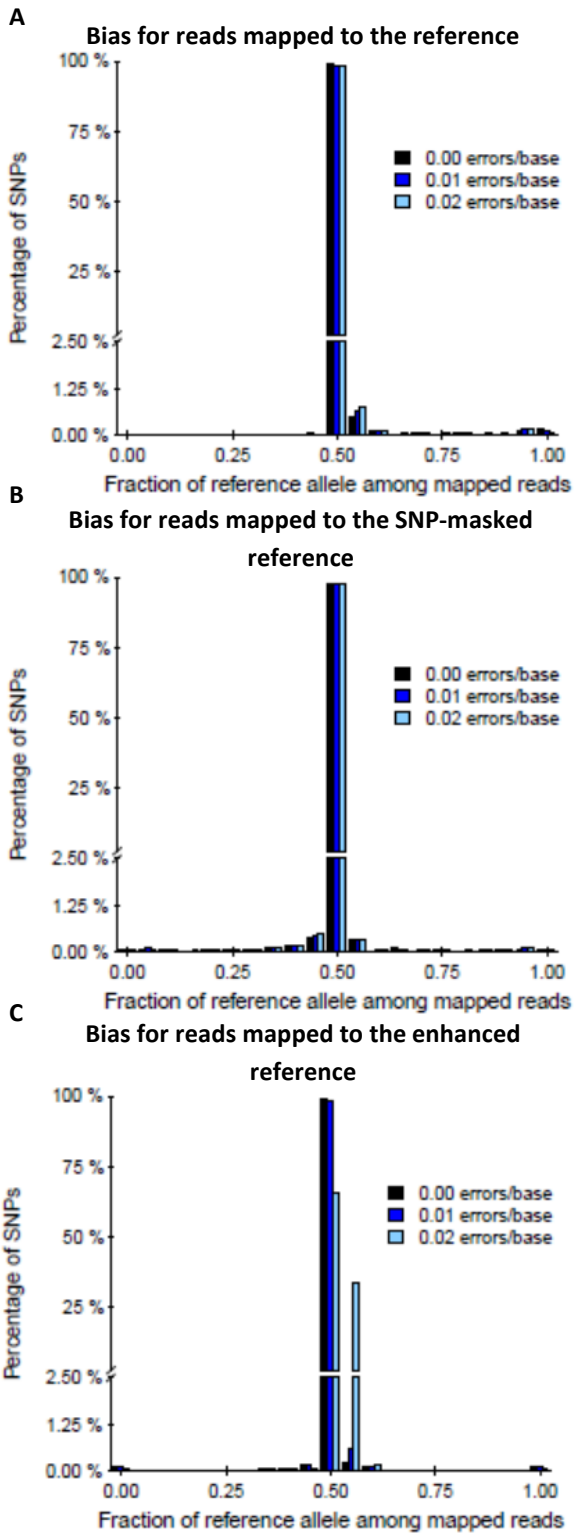

**Fig. S13.** Read-mapping biases for simulated 70-bp reads mapped using MAQ with mapping quality > 0.

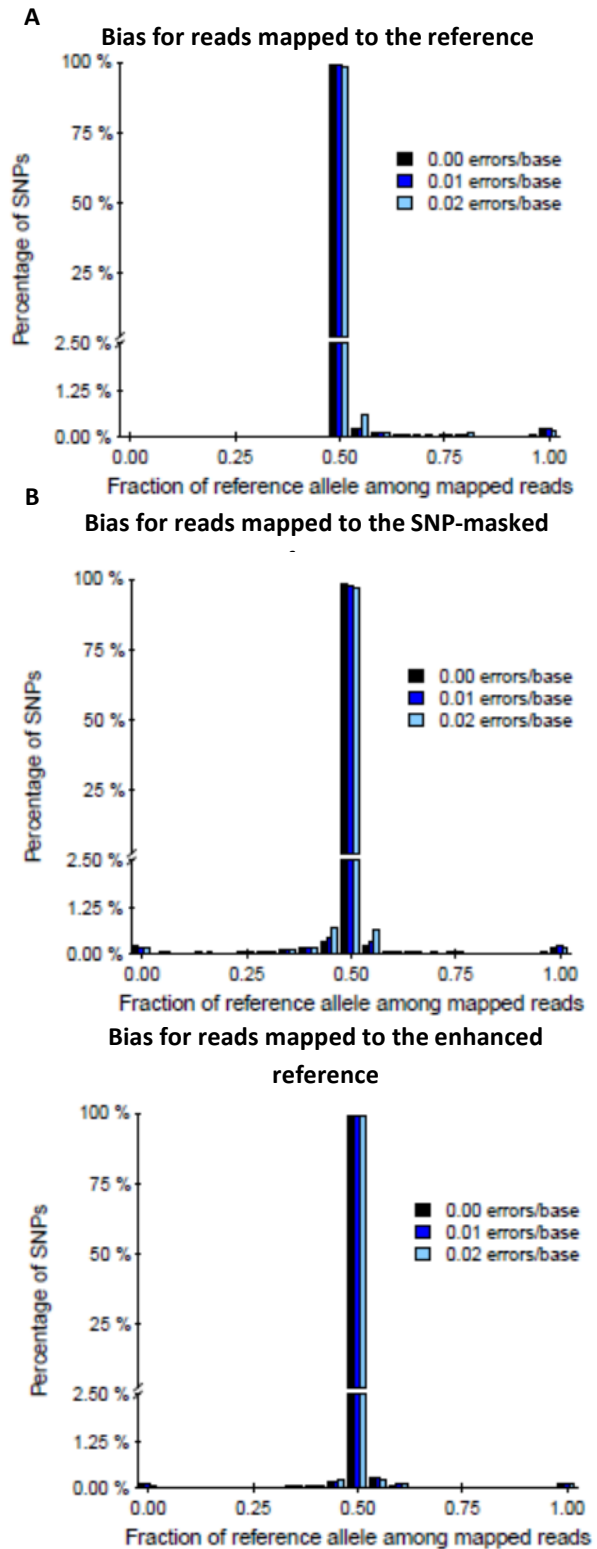

**Fig. S14.** Read-mapping biases for simulated 70-bp reads mapped using BWA with mapping quality > 0.

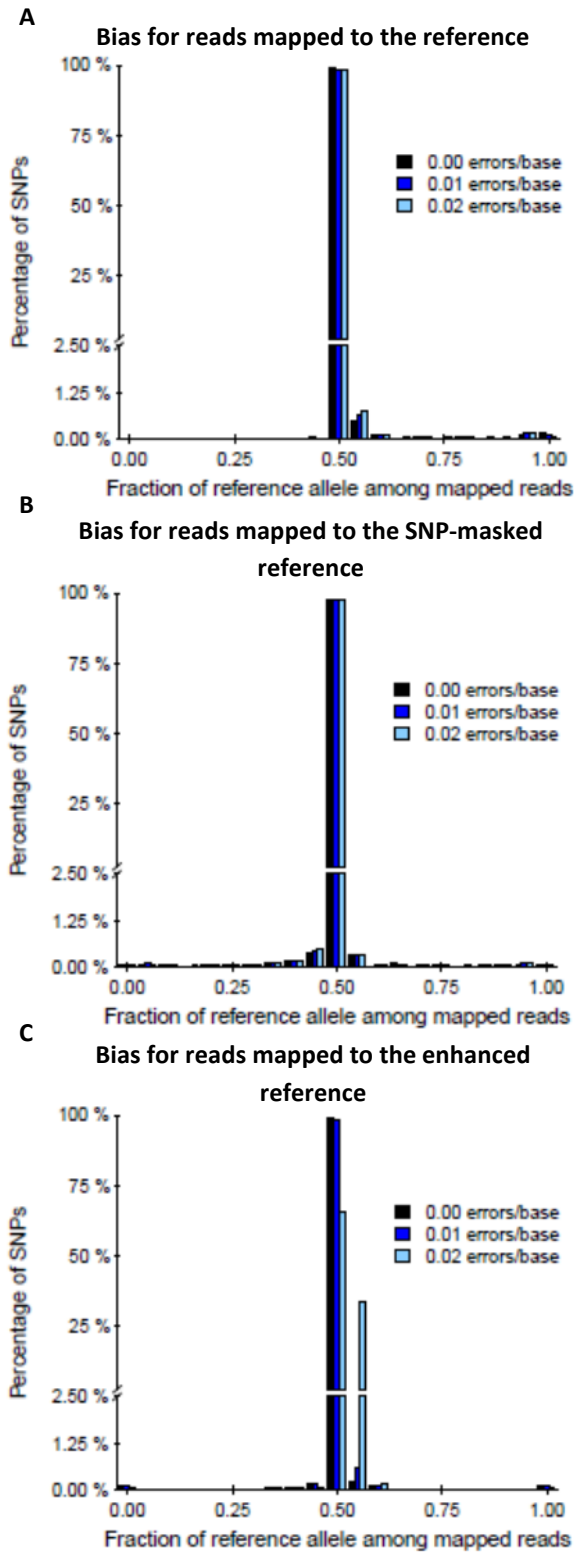

**Fig. S15.** Read-mapping biases for simulated 100-bp reads mapped using MAQ with mapping quality > 0.

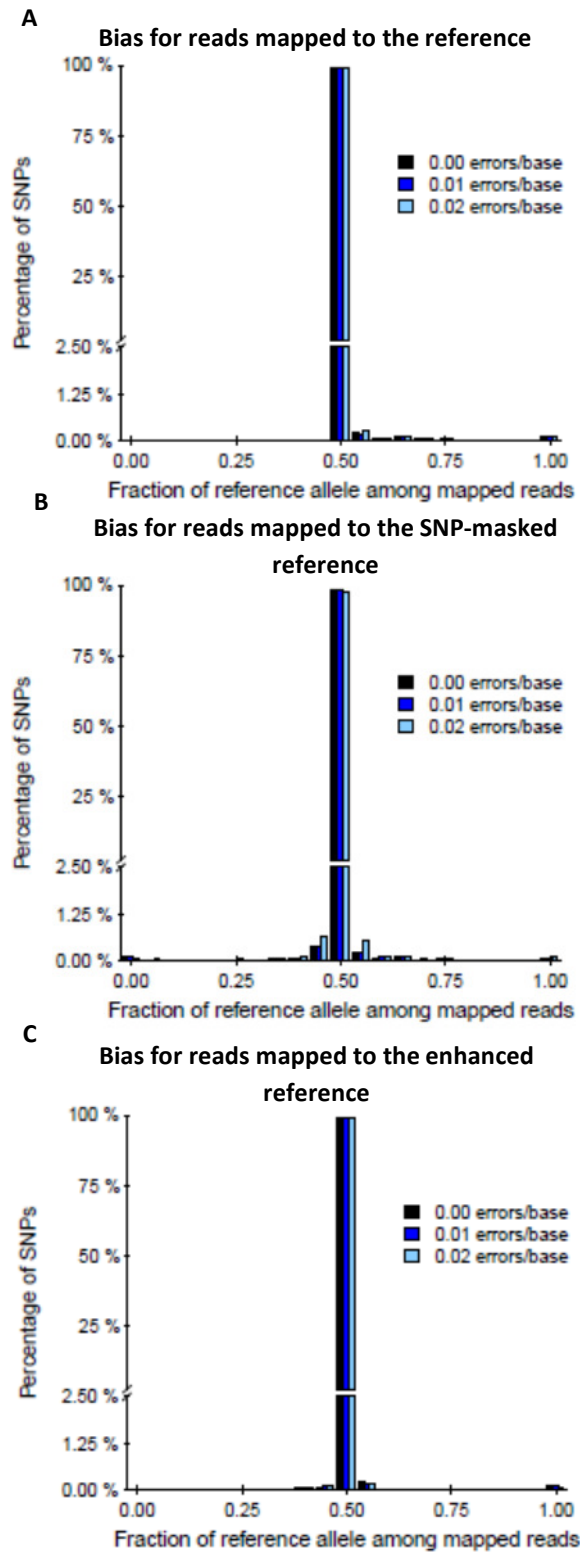

**Fig. S16.** Read-mapping biases for simulated 100-bp reads mapped using BWA with mapping quality > 0.

**Table S2.** The numbers of biased loci (*i.e.*, loci showing a difference in the proportions of the mapped reads) when equal numbers of simulated reads from each allele were mapped using the three methods, and the reads with a mapping quality of zero were eliminated. The difference in the frequencies of the two alleles in the mapped reads is given by  $\Delta p$ .  $\Delta p \geq 10\%$  implies that  $\geq 55\%$  of the mapped reads carry one allele while  $\leq 45\%$  carry the other. Similarly,  $\Delta p \geq 5\%$  implies that  $\geq 52.5\%$  of the mapped reads carry one allele while  $\leq 47.5\%$  carry the other. The enhanced reference approach still outperformed the other two methods in most cases for the MAQ mappings and in almost all cases for the BWA mappings.

| MAQ          | $\Delta p \geq 10\%$ |      |      | $\Delta p \geq 5\%$ |      |      | $\Delta p \geq 2\%$ |      |      |
|--------------|----------------------|------|------|---------------------|------|------|---------------------|------|------|
|              | 0.00                 | 0.01 | 0.02 | 0.00                | 0.01 | 0.02 | 0.00                | 0.01 | 0.02 |
| <b>r=35</b>  |                      |      |      |                     |      |      |                     |      |      |
| Unaltered    | 233                  | 234  | 1060 | 287                 | 570  | 6332 | 364                 | 5047 | 8972 |
| Masked       | 404                  | 419  | 520  | 476                 | 733  | 2080 | 548                 | 3450 | 5522 |
| Enhanced     | 180                  | 187  | 222  | 229                 | 580  | 1935 | 280                 | 4953 | 6494 |
| <b>r=70</b>  |                      |      |      |                     |      |      |                     |      |      |
| Unaltered    | 101                  | 105  | 106  | 147                 | 160  | 167  | 235                 | 243  | 898  |
| Masked       | 207                  | 193  | 187  | 253                 | 241  | 240  | 338                 | 380  | 835  |
| Enhanced     | 75                   | 74   | 101  | 104                 | 141  | 3403 | 214                 | 4065 | 8320 |
| <b>r=100</b> |                      |      |      |                     |      |      |                     |      |      |
| Unaltered    | 75                   | 77   | 81   | 99                  | 103  | 110  | 179                 | 184  | 390  |
| Masked       | 155                  | 155  | 148  | 198                 | 192  | 197  | 279                 | 294  | 450  |
| Enhanced     | 49                   | 52   | 76   | 152                 | 211  | 2182 | 1047                | 2378 | 7117 |
| <b>BWA</b>   |                      |      |      |                     |      |      |                     |      |      |
| <b>r=35</b>  |                      |      |      |                     |      |      |                     |      |      |
| Unaltered    | 206                  | 219  | 1042 | 242                 | 530  | 6336 | 263                 | 5042 | 8969 |
| Masked       | 390                  | 411  | 515  | 458                 | 715  | 2060 | 521                 | 3442 | 5514 |
| Enhanced     | 184                  | 192  | 199  | 261                 | 279  | 364  | 462                 | 1013 | 2992 |
| <b>r=70</b>  |                      |      |      |                     |      |      |                     |      |      |
| Unaltered    | 100                  | 100  | 106  | 114                 | 115  | 149  | 131                 | 135  | 3719 |
| Masked       | 195                  | 186  | 181  | 229                 | 235  | 291  | 269                 | 383  | 1766 |
| Enhanced     | 78                   | 79   | 80   | 110                 | 109  | 113  | 235                 | 272  | 691  |
| <b>r=100</b> |                      |      |      |                     |      |      |                     |      |      |
| Unaltered    | 68                   | 70   | 72   | 78                  | 78   | 89   | 89                  | 90   | 3376 |
| Masked       | 135                  | 131  | 129  | 170                 | 167  | 218  | 191                 | 241  | 1385 |
| Enhanced     | 52                   | 53   | 53   | 71                  | 73   | 70   | 138                 | 187  | 440  |

### 2.3 Frequency of high-SNP-density windows

A single  $r$ -window with  $k$  SNPs results in  $2^k - 1$  enhanced segments generated for that window. Therefore, windows with a large number of SNPs generate too many enhanced segments. As this situation is somewhat undesirable, it is helpful to see how often this situation occurs in actual SNP datasets. Supplementary Tables S3 and S4 show that this situation occurs very rarely.

**Table S3.** The number of 100-bp windows with  $\geq k$  SNPs for different values of  $k$  in Chr1. Non-coding SNPs are also shown for comparison, even though it is not necessary to build enhanced segments for these non-coding SNPs as these regions are never expressed, unless they are part of some non-coding RNA. The number of windows with  $\geq k$  SNPs rapidly decreased with increasing  $k$ . There are only two 100-bp windows with  $\geq 6$  exonic/UTR SNPs. Even when non-coding SNPs were included, there were only 34 such windows in HapMap release 22, and 38 such windows in HapMap release 28.

| <b><math>K</math> = no. SNPs within a 100-bp window</b> | <b>No. of windows with <math>\geq k</math> SNPs</b> |                                             |                                      |
|---------------------------------------------------------|-----------------------------------------------------|---------------------------------------------|--------------------------------------|
|                                                         | <b>Exonic+UTR Yoruba SNPs in HapMap release 22</b>  | <b>All Yoruba SNPs in HapMap release 22</b> | <b>All SNPs in HapMap release 28</b> |
| 1                                                       | 9362                                                | 294968                                      | 326026                               |
| 2                                                       | 1651                                                | 55577                                       | 64194                                |
| 3                                                       | 238                                                 | 7249                                        | 8908                                 |
| 4                                                       | 36                                                  | 937                                         | 1210                                 |
| 5                                                       | 6                                                   | 159                                         | 202                                  |
| 6                                                       | 2                                                   | 34                                          | 38                                   |
| 7                                                       | 0                                                   | 5                                           | 6                                    |
| 8                                                       | 0                                                   | 0                                           | 0                                    |

**Table S4.** The number of 100-bp windows with  $\geq k$  SNPs for different values of  $k$  in all 24 chromosomes. Non-coding SNPs are also shown for comparison. As in case of Chr1, the number of windows with  $\geq k$  SNPs rapidly decreased with increasing  $k$ . There are only 39 windows with  $\geq 6$  exonic/UTR SNPs. Even when non-coding SNPs were included, there were only 476 such windows in all chromosomes.

| <b><math>K</math> = no. SNPs within a 100-bp window</b> | <b>No. of windows with <math>\geq k</math> SNPs</b> |                                          |
|---------------------------------------------------------|-----------------------------------------------------|------------------------------------------|
|                                                         | <b>Exonic and UTR Yoruba HapMap release 22 SNPs</b> | <b>All HapMap Yoruba release 22 SNPs</b> |
| 1                                                       | 94548                                               | 3788495                                  |
| 2                                                       | 16772                                               | 730412                                   |
| 3                                                       | 2463                                                | 97536                                    |
| 4                                                       | 424                                                 | 12230                                    |
| 5                                                       | 103                                                 | 1991                                     |
| 6                                                       | 39                                                  | 476                                      |
| 7                                                       | 17                                                  | 135                                      |
| 8                                                       | 9                                                   | 46                                       |
| 9                                                       | 4                                                   | 20                                       |
| 10                                                      | 0                                                   | 10                                       |

### 2.4 Mapping bias in high-SNP-density windows

We selected the 39 windows in Supplementary Table S4 with  $\geq 6$  exonic or UTR SNPs to evaluate mapping bias. These 39 windows contained a total of 134 SNPs (some of these windows overlap with



each other). Evaluating mapping bias in these windows is complicated because there are multiple SNPs in each window. Therefore, it is not possible to determine which haplotypes should be used in generating the simulated reads. To allow for unbiased testing, we included all haplotypes in generation of the simulated reads, and generated one read from each 100-bp window from each strand of each possible haplotype. The exact number of haplotypes that any SNP is involved in depends on the number of nearby SNPs and exact distances between the nearby SNPs. Therefore, this procedure resulted in different numbers of simulated reads that overlap different SNPs. This scheme generated a total of 273008 reads, with a minimum of 2288 reads overlapping each SNP. At each SNP locus, equal numbers of reads contained the reference and the non-reference alleles. We mapped the reads using the MAQ program, and ignored mapping qualities. Figures S17 and S18 show the percentage of mapped reads and the mapping bias for the different reference construction methods.

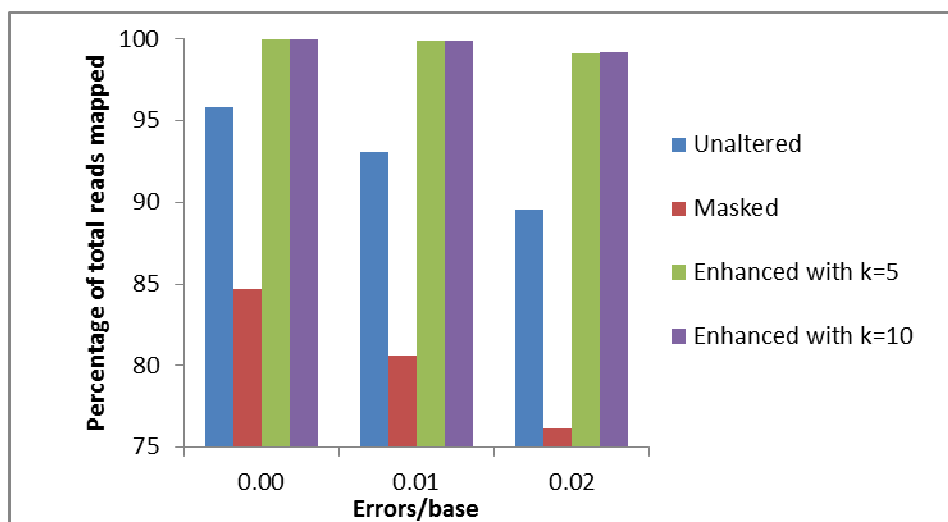

**Fig. S17.** Percentages of simulated reads that could be mapped to 100-bp windows with  $\geq 6$  exonic or UTR SNPs. A significant percentage of the reads cannot be mapped to the unaltered reference and masked reference approaches, and these mappings worsened as the error rate increased. However, the enhanced reference approach was able to map >99% of the reads, even at higher error rates. The limit on the maximum number of SNPs in a 100-bp window ( $k$ ) has almost no impact on the performance of the enhanced reference approach. Setting  $k = 5$  affected only 0.05% of the reads as compared with setting  $k = 10$ .

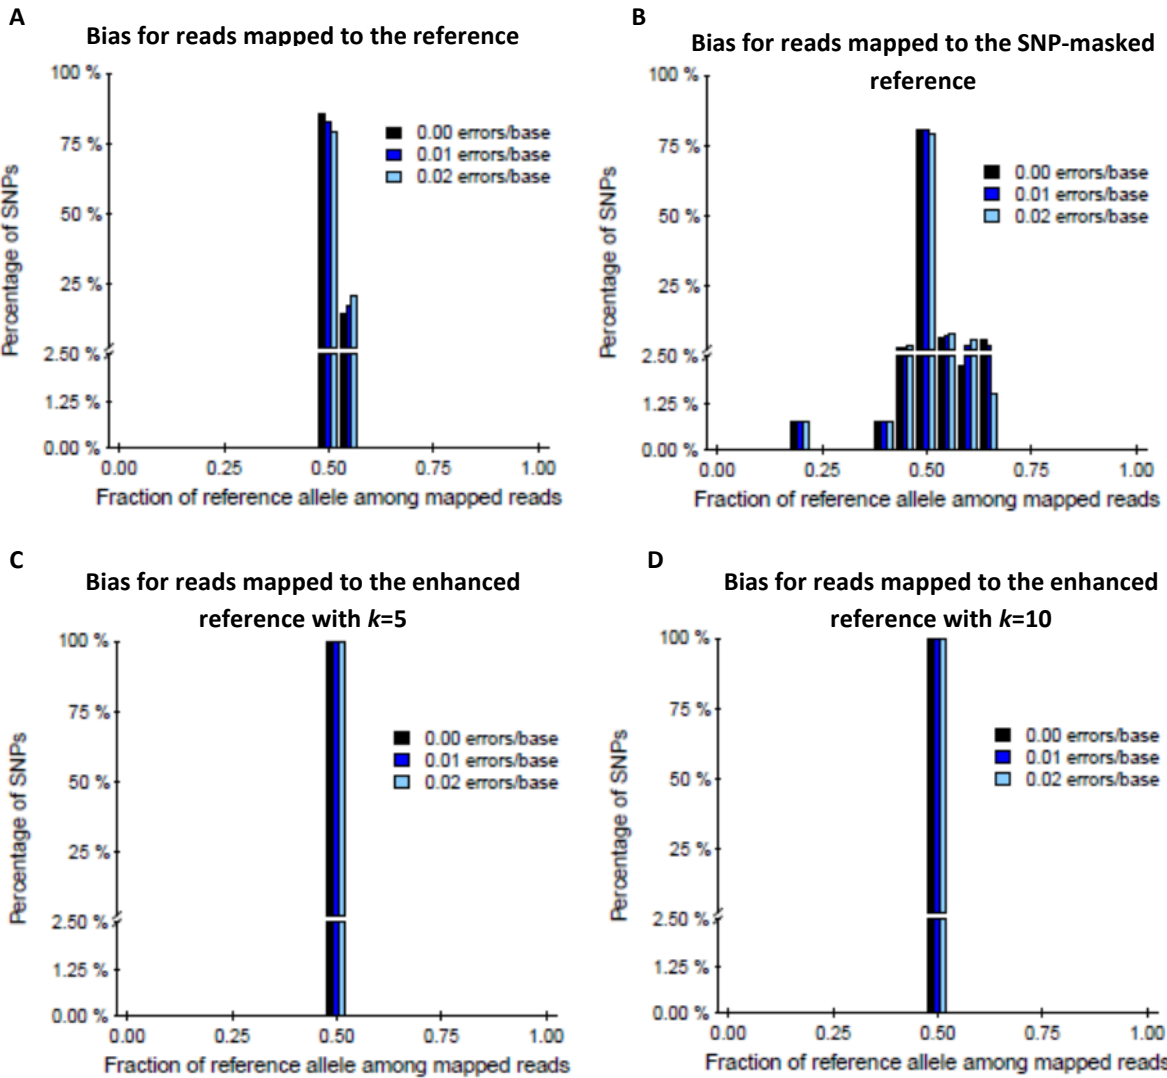

**Fig. S18.** Read-mapping biases for simulated reads at loci with  $\geq 6$  exonic and UTR SNPs within 100 bp. A significant proportion of the loci were biased in both the unaltered reference and masked reference approaches. When the enhanced reference was constructed using a limit of 5 SNPs within 100 bp, there was no significant bias at any error rate. Similarly, when the enhanced reference was constructed with a limit of 10 SNPs within 100 bp, there was no bias even at high error rates.

### 3. Results on RNA-Seq data

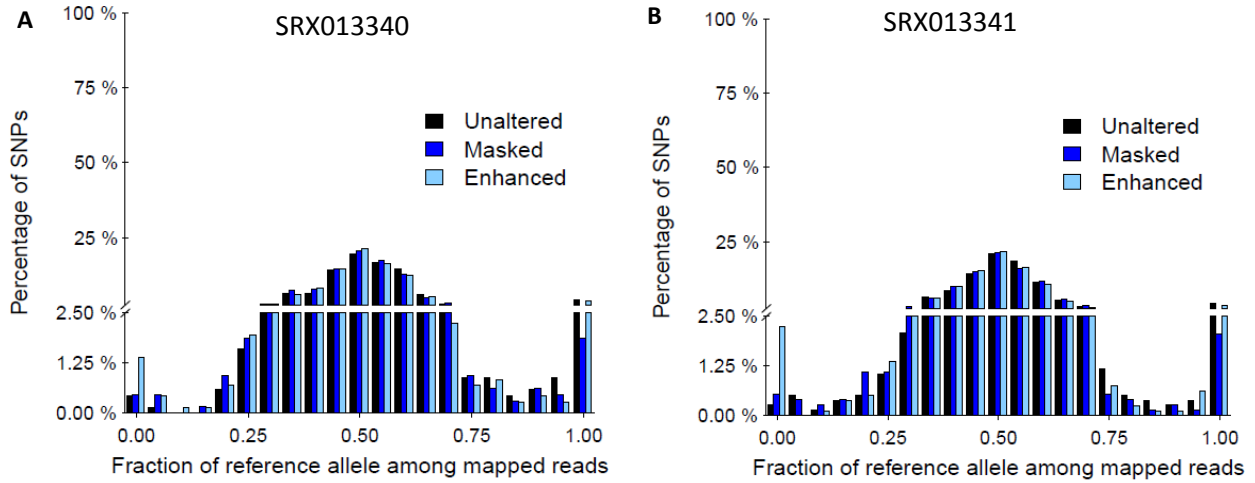

**Fig. S19.** Histograms of ASE for the two individuals in the actual RNA-Seq data. The histograms cover exonic and UTR loci with  $\geq 20$  mapped reads. As would be expected in any actual data set, some loci do exhibit ASE. However, only a small fraction of these loci (listed in Tables S5 and S6) show statistically significant ASE. Most of the loci with significant ASE come from the tails in the histograms. The unaltered reference and masked reference approaches show much larger number of loci specific to the reference allele than to the non-reference allele, indicating a bias toward the reference allele. These differences are much smaller for the enhanced reference approach.

**Table S5.** List of loci with significant allele-specific expression in individual GM19238 at a false discovery rate (FDR) of 1%. Reads were mapped to the enhanced reference. The column labeled ‘other reads’ mainly consists of sequencing errors or mapping errors.

| SNP ID     | Chromosome | Position (hg 18) | Ref Reads | Non-Ref Reads | Other Reads | Gene      |
|------------|------------|------------------|-----------|---------------|-------------|-----------|
| rs1158     | chr10      | 22865294         | 23        | 5             | 0           | PIP4K2A   |
| rs2574943  | chr10      | 51695173         | 0         | 23            | 0           | LOC728532 |
| rs7914886  | chr10      | 97345055         | 45        | 1             | 1           | LOC643981 |
| rs2848622  | chr11      | 57100600         | 305       | 1             | 0           | LOC390183 |
| rs7309149  | chr12      | 12895367         | 73        | 0             | 0           | RPS6P1    |
| rs3759294  | chr12      | 31835958         | 61        | 0             | 0           | LOC440093 |
| rs3888051  | chr12      | 62503257         | 87        | 0             | 0           | LOC341315 |
| rs916974   | chr12      | 111931395        | 42        | 18            | 2           | OAS2      |
| rs11619791 | chr13      | 24568984         | 4         | 140           | 0           | PABPC3    |
| rs11160859 | chr14      | 105181102        | 109       | 4             | 2           | IGHG2     |
| rs2731202  | chr14      | 106106026        | 44        | 0             | 0           | IGHV5-51  |
| rs12441946 | chr15      | 70978916         | 1         | 35            | 0           | LOC729686 |
| rs4784800  | chr16      | 55957003         | 236       | 86            | 2           | CCL22     |
| rs7214234  | chr17      | 1708330          | 25        | 0             | 0           | LOC642502 |
| rs4791596  | chr17      | 14549410         | 988       | 3             | 13          | LOC388339 |
| rs525911   | chr17      | 38065445         | 2         | 19            | 0           | TUBG2     |
| rs1139405  | chr17      | 77092614         | 1027      | 687           | 6           | ACTG1     |
| rs12610462 | chr19      | 22343302         | 0         | 259           | 0           | LOC342994 |
| rs7417535  | chr1       | 16006574         | 1         | 33            | 1           | LOC440567 |
| rs6677535  | chr1       | 40371584         | 360       | 0             | 0           | LOC728602 |
| rs17459    | chr1       | 74944339         | 28        | 4             | 1           | CRYZ      |
| rs3819946  | chr1       | 74948474         | 34        | 9             | 0           | CRYZ      |

|            |       |           |     |     |    |              |
|------------|-------|-----------|-----|-----|----|--------------|
| rs273259   | chr1  | 78866406  | 10  | 31  | 1  | IFI44L       |
| rs2794041  | chr1  | 143823777 | 39  | 0   | 0  | SEC22B       |
| rs6682136  | chr1  | 148861639 | 59  | 5   | 1  | ENSA         |
| rs2223477  | chr1  | 169575456 | 0   | 30  | 0  | TOP1P1       |
| rs7513402  | chr1  | 234714134 | 3   | 242 | 1  | EDARADD      |
| rs1807676  | chr22 | 25613521  | 0   | 101 | 0  | LOC100130624 |
| rs7578292  | chr2  | 136673203 | 34  | 3   | 0  | LOC389053    |
| rs17044594 | chr3  | 18556112  | 58  | 0   | 0  | LOC131185    |
| rs6792846  | chr3  | 134790181 | 23  | 5   | 0  | CDV3         |
| rs16858473 | chr3  | 185350316 | 99  | 0   | 3  | LOC440991    |
| rs10022054 | chr4  | 43595905  | 0   | 87  | 1  | LOC402175    |
| rs17008180 | chr4  | 106625532 | 200 | 1   | 1  | EEF1AL7      |
| rs7662486  | chr4  | 113928795 | 53  | 0   | 0  | LOC441034    |
| rs17008716 | chr4  | 165338000 | 52  | 0   | 3  | LOC646954    |
| rs6875717  | chr5  | 92629704  | 0   | 20  | 0  | LOC391811    |
| rs2009646  | chr5  | 108148857 | 1   | 365 | 1  | LOC643534    |
| rs1061837  | chr5  | 150541530 | 22  | 6   | 0  | CCDC69       |
| rs11953084 | chr5  | 177415300 | 202 | 1   | 12 | LOC653314    |
| rs11953029 | chr5  | 177415790 | 329 | 3   | 6  | LOC653314    |
| rs2734945  | chr6  | 29963924  | 169 | 2   | 0  | HLA-H        |
| rs9461576  | chr6  | 30337105  | 31  | 3   | 3  | FLJ45422     |
| rs1058026  | chr6  | 31429664  | 410 | 321 | 3  | HLA-B        |
| rs8084     | chr6  | 32519013  | 396 | 562 | 2  | HLA-DRA      |
| rs7192     | chr6  | 32519624  | 217 | 329 | 0  | HLA-DRA      |
| rs701831   | chr6  | 32657379  | 106 | 366 | 1  | HLA-DRB1     |
| rs9273655  | chr6  | 32737187  | 181 | 2   | 2  | HLA-DQB1     |
| rs7739387  | chr6  | 34730399  | 3   | 17  | 0  | LOC100129061 |
| rs2814966  | chr6  | 34820210  | 130 | 0   | 0  | LOC646785    |
| rs13319    | chr6  | 107124347 | 7   | 26  | 1  | AIM1         |
| rs2430028  | chr7  | 122108911 | 24  | 0   | 0  | LOC645979    |
| rs11986385 | chr8  | 30094837  | 470 | 0   | 1  | LOC648729    |
| rs10106469 | chr8  | 30330002  | 62  | 3   | 0  | LOC100131210 |
| rs20583    | chr9  | 33016572  | 26  | 8   | 0  | DNAJA1       |
| rs9410092  | chr9  | 140190645 | 0   | 21  | 0  | LOC643224    |
| rs7205     | chrX  | 1468324   | 122 | 186 | 2  | SLC25A6      |
| rs16981209 | chrX  | 19464216  | 28  | 4   | 0  | SH3KBP1      |
| rs909713   | chrX  | 47547916  | 0   | 20  | 0  | WASF4        |
| rs6624600  | chrX  | 71296606  | 69  | 1   | 0  | FLJ44635     |
| rs3088376  | chrX  | 118647434 | 97  | 23  | 1  | SEPT6        |

**Table S6.** List of loci with significant allele-specific expression in individual GM19239 at an FDR of 1%. Reads were mapped to the enhanced reference. The column labeled ‘other reads’ mainly consists of sequencing errors or mapping errors.

| SNP ID     | Chromosome | Position<br>(hg 18) | Ref Reads | Non-Ref<br>Reads | Other Reads | Gene      |
|------------|------------|---------------------|-----------|------------------|-------------|-----------|
| rs2228064  | chr10      | 45198056            | 4         | 19               | 1           | ALOX5     |
| rs2574943  | chr10      | 51695173            | 0         | 35               | 0           | LOC728532 |
| rs1049455  | chr10      | 103910465           | 19        | 4                | 0           | NOLC1     |
| rs2089910  | chr11      | 1830980             | 223       | 0                | 1           | LSP1      |
| rs2071461  | chr11      | 11330536            | 0         | 32               | 0           | CSNK2A1P  |
| rs2848622  | chr11      | 57100600            | 206       | 1                | 0           | LOC390183 |
| rs6591717  | chr11      | 62091484            | 315       | 236              | 3           | EEF1G     |
| rs7927338  | chr11      | 93561259            | 20        | 0                | 0           | LOC729494 |
| rs11831812 | chr12      | 4077714             | 0         | 32               | 0           | LOC399988 |
| rs4765775  | chr12      | 4284387             | 46        | 19               | 0           | CCND2     |
| rs3759294  | chr12      | 31835958            | 38        | 1                | 0           | LOC440093 |
| rs14105    | chr13      | 27137970            | 17        | 48               | 0           | POLR1D    |

|            |       |           |     |     |    |              |
|------------|-------|-----------|-----|-----|----|--------------|
| rs2731202  | chr14 | 106106026 | 610 | 17  | 4  | IGHV5-51     |
| rs2589529  | chr15 | 33317322  | 1   | 60  | 0  | LOC723972    |
| rs12441946 | chr15 | 70978916  | 0   | 26  | 1  | LOC729686    |
| rs7214234  | chr17 | 1708330   | 36  | 0   | 0  | LOC642502    |
| rs4791596  | chr17 | 14549410  | 706 | 1   | 5  | LOC388339    |
| rs4792757  | chr17 | 16461158  | 22  | 0   | 0  | LOC644422    |
| rs199455   | chr17 | 42154400  | 1   | 168 | 0  | LOC644315    |
| rs16952692 | chr18 | 46693267  | 27  | 0   | 0  | ME2          |
| rs10250    | chr19 | 4052062   | 14  | 37  | 1  | MAP2K2       |
| rs17627    | chr19 | 44615792  | 469 | 630 | 5  | RPS16        |
| rs3170545  | chr19 | 55128527  | 9   | 40  | 0  | ATF5         |
| rs8647     | chr19 | 55128792  | 10  | 81  | 1  | ATF5         |
| rs6677535  | chr1  | 40371584  | 393 | 0   | 0  | LOC728602    |
| rs13306758 | chr1  | 43165406  | 31  | 0   | 0  | SLC2A1       |
| rs631045   | chr1  | 78330102  | 0   | 35  | 1  | LOC729768    |
| rs630245   | chr1  | 78330252  | 29  | 0   | 0  | LOC729768    |
| rs4000303  | chr1  | 96686353  | 0   | 43  | 3  | LOC440595    |
| rs3871984  | chr1  | 143823858 | 49  | 0   | 0  | SEC22B       |
| rs4950386  | chr1  | 145142175 | 0   | 26  | 0  | LOC644131    |
| rs7546434  | chr1  | 145142963 | 0   | 26  | 0  | LOC644131    |
| rs7695     | chr1  | 154413950 | 11  | 44  | 0  | SEMA4A       |
| rs2488896  | chr1  | 164513043 | 0   | 47  | 0  | LOC284685    |
| rs2223477  | chr1  | 169575456 | 1   | 52  | 0  | TOP1P1       |
| rs6570     | chr21 | 45130540  | 51  | 22  | 0  | ITGB2        |
| rs1807676  | chr22 | 25613521  | 0   | 101 | 0  | LOC100130624 |
| rs8177832  | chr22 | 37807512  | 4   | 24  | 0  | APOBEC3G     |
| rs7599670  | chr2  | 41900536  | 0   | 21  | 0  | LDHAL3       |
| rs1997     | chr2  | 42431310  | 24  | 2   | 0  | COX7A2L      |
| rs17014852 | chr2  | 127537677 | 48  | 0   | 0  | BIN1         |
| rs7578292  | chr2  | 136673203 | 35  | 1   | 0  | LOC389053    |
| rs10031608 | chr4  | 12948262  | 48  | 0   | 0  | HSP90AB2P    |
| rs7662486  | chr4  | 113928795 | 64  | 0   | 0  | LOC441034    |
| rs7662013  | chr4  | 174791881 | 0   | 171 | 0  | LOC100128266 |
| rs7404     | chr5  | 133335760 | 90  | 45  | 2  | VDAC1        |
| rs11953084 | chr5  | 177415300 | 219 | 2   | 20 | LOC653314    |
| rs11953029 | chr5  | 177415790 | 198 | 4   | 2  | LOC653314    |
| rs1736924  | chr6  | 29800990  | 0   | 124 | 0  | HLA-F        |
| rs2734945  | chr6  | 29963924  | 76  | 2   | 0  | HLA-H        |
| rs2428512  | chr6  | 29964309  | 200 | 2   | 1  | HLA-H        |
| rs1051336  | chr6  | 32520570  | 448 | 293 | 2  | HLA-DRA      |
| rs9276436  | chr6  | 32822061  | 127 | 1   | 0  | HLA-DQA2     |
| rs762815   | chr6  | 32837620  | 0   | 50  | 1  | HLA-DQB2     |
| rs2071888  | chr6  | 33380833  | 56  | 26  | 0  | TAPBP        |
| rs2814966  | chr6  | 34820210  | 103 | 0   | 0  | LOC646785    |
| rs10947623 | chr6  | 36750814  | 40  | 0   | 0  | LOC389386    |
| rs13296    | chr6  | 44326098  | 231 | 162 | 0  | HSP90AB1     |
| rs1059307  | chr6  | 86444607  | 15  | 92  | 0  | SNORD50B     |
| rs10266655 | chr7  | 24705083  | 33  | 12  | 0  | DFNA5        |
| rs3087615  | chr7  | 102739359 | 26  | 7   | 1  | PMPCB        |
| rs4726719  | chr7  | 143975161 | 575 | 0   | 2  | LOC100132804 |
| rs11986385 | chr8  | 30094837  | 219 | 0   | 0  | LOC648729    |
| rs2719323  | chr8  | 34300101  | 76  | 3   | 0  | CYCSP3       |
| rs9410092  | chr9  | 140190645 | 1   | 45  | 0  | LOC643224    |
| rs7205     | chrX  | 1468324   | 94  | 186 | 2  | SLC25A6      |

**Table S7.** Comparison of the three mapping methods at each locus that was significant at 1% FDR in at least one out of the three methods for individual GM19238. In most loci, the enhanced reference approach was able to map the largest number of reference and non-reference reads.

| SNP ID     | Chromosome | Position (hg 18) | Unaltered |               |             | Masked    |               |             | Enhanced  |               |             | Gene         | Unaltered Significant | Masked Significant | Enhanced Significant |
|------------|------------|------------------|-----------|---------------|-------------|-----------|---------------|-------------|-----------|---------------|-------------|--------------|-----------------------|--------------------|----------------------|
|            |            |                  | Ref Reads | Non-Ref Reads | Other Reads | Ref Reads | Non-Ref Reads | Other Reads | Ref Reads | Non-Ref Reads | Other Reads |              |                       |                    |                      |
| rs7662486  | chr4       | 113928795        | 42        | 0             | 0           | 8         | 0             | 1           | 53        | 0             | 0           | LOC441034    | Yes                   | No                 | Yes                  |
| rs10106469 | chr8       | 30330002         | 51        | 1             | 0           | 14        | 0             | 2           | 62        | 3             | 0           | LOC100131210 | Yes                   | No                 | Yes                  |
| rs16981209 | chrX       | 19464216         | 28        | 4             | 0           | 28        | 4             | 0           | 28        | 4             | 0           | SH3KBP1      | Yes                   | Yes                | Yes                  |
| rs16978523 | chr18      | 41929062         | 46        | 52            | 1           | 14        | 51            | 1           | 52        | 68            | 1           | TRNAK-CUU    | No                    | Yes                | No                   |
| rs10022054 | chr4       | 43595905         | 0         | 46            | 1           | 0         | 53            | 1           | 0         | 87            | 1           | LOC402175    | Yes                   | Yes                | Yes                  |
| rs2073687  | chr11      | 8663809          | 208       | 12            | 0           | 15        | 11            | 0           | 200       | 165           | 0           | SNORA45      | Yes                   | No                 | No                   |
| rs1807676  | chr22      | 25613521         | 0         | 0             | 0           | 0         | 0             | 0           | 0         | 101           | 0           | LOC100130624 | No                    | No                 | Yes                  |
| rs4784800  | chr16      | 55957003         | 236       | 84            | 2           | 235       | 84            | 2           | 236       | 86            | 2           | CCL22        | Yes                   | Yes                | Yes                  |
| rs14408    | chr11      | 298314           | 36        | 0             | 0           | 10        | 1             | 0           | 50        | 45            | 0           | IFITM2       | Yes                   | No                 | No                   |
| rs11619791 | chr13      | 24568984         | 5         | 3             | 0           | 2         | 1             | 0           | 4         | 140           | 0           | PABPC3       | No                    | No                 | Yes                  |
| rs1053492  | chr15      | 41849094         | 28        | 35            | 2           | 1         | 22            | 1           | 26        | 47            | 1           | PDIA3        | No                    | Yes                | No                   |
| rs11160859 | chr14      | 105181102        | 92        | 4             | 2           | 47        | 4             | 2           | 109       | 4             | 2           | IGHG2        | Yes                   | Yes                | Yes                  |
| rs12610462 | chr19      | 22343302         | 0         | 13            | 2           | 0         | 8             | 3           | 0         | 259           | 0           | LOC342994    | No                    | No                 | Yes                  |
| rs8084     | chr6       | 32519013         | 396       | 556           | 2           | 393       | 556           | 2           | 396       | 562           | 2           | HLA-DRA      | Yes                   | Yes                | Yes                  |
| rs3088376  | chrX       | 118647434        | 97        | 22            | 1           | 97        | 22            | 1           | 97        | 23            | 1           | SEPT6        | Yes                   | Yes                | Yes                  |
| rs1139405  | chr17      | 77092614         | 1003      | 667           | 6           | 776       | 669           | 5           | 1027      | 687           | 6           | ACTG1        | Yes                   | No                 | Yes                  |
| rs17008180 | chr4       | 106625532        | 218       | 0             | 3           | 2         | 0             | 3           | 200       | 1             | 1           | EEF1AL7      | Yes                   | No                 | Yes                  |
| rs1792624  | chr11      | 93561458         | 21        | 0             | 0           | 0         | 0             | 0           | 14        | 0             | 0           | LOC729494    | Yes                   | No                 | No                   |
| rs9461576  | chr6       | 30337105         | 21        | 2             | 1           | 17        | 1             | 1           | 31        | 3             | 3           | FLJ45422     | Yes                   | No                 | Yes                  |
| rs11953029 | chr5       | 177415790        | 324       | 1             | 6           | 1         | 1             | 9           | 329       | 3             | 6           | LOC653314    | Yes                   | No                 | Yes                  |
| rs6677535  | chr1       | 40371584         | 357       | 0             | 0           | 233       | 0             | 0           | 360       | 0             | 0           | LOC728602    | Yes                   | Yes                | Yes                  |
| rs13319    | chr6       | 107124347        | 7         | 26            | 1           | 7         | 26            | 1           | 7         | 26            | 1           | AIM1         | No                    | Yes                | Yes                  |
| rs2848622  | chr11      | 57100600         | 302       | 1             | 2           | 10        | 1             | 2           | 305       | 1             | 0           | LOC390183    | Yes                   | No                 | Yes                  |
| rs7739387  | chr6       | 34730399         | 3         | 16            | 0           | 3         | 16            | 0           | 3         | 17            | 0           | LOC100129061 | No                    | No                 | Yes                  |
| rs7914886  | chr10      | 97345055         | 54        | 0             | 1           | 1         | 0             | 2           | 45        | 1             | 1           | LOC643981    | Yes                   | No                 | Yes                  |
| rs1061837  | chr5       | 150541530        | 22        | 6             | 0           | 21        | 6             | 0           | 22        | 6             | 0           | CCDC69       | Yes                   | No                 | Yes                  |
| rs9276976  | chr6       | 33081772         | 17        | 4             | 0           | 17        | 4             | 0           | 17        | 4             | 0           | HLA-DOA      | Yes                   | No                 | No                   |
| rs7359861  | chr19      | 40834027         | 94        | 37            | 2           | 76        | 40            | 2           | 94        | 98            | 2           | COX6B1       | Yes                   | Yes                | No                   |
| rs701831   | chr6       | 32657379         | 101       | 20            | 0           | 0         | 12            | 1           | 106       | 366           | 1           | HLA-DRB1     | Yes                   | No                 | Yes                  |
| rs7513402  | chr1       | 234714134        | 3         | 78            | 1           | 3         | 78            | 1           | 3         | 242           | 1           | EDARADD      | Yes                   | Yes                | Yes                  |
| rs1042448  | chr6       | 33162320         | 96        | 4             | 0           | 83        | 4             | 0           | 96        | 106           | 0           | RPL32P1      | Yes                   | Yes                | No                   |
| rs3819946  | chr1       | 74948474         | 34        | 9             | 0           | 31        | 9             | 0           | 34        | 9             | 0           | CRYZ         | Yes                   | Yes                | Yes                  |
| rs6624600  | chrX       | 71296606         | 75        | 0             | 0           | 76        | 1             | 0           | 69        | 1             | 0           | FLJ44635     | Yes                   | Yes                | Yes                  |
| rs7192     | chr6       | 32519624         | 217       | 325           | 0           | 214       | 325           | 0           | 217       | 329           | 0           | HLA-DRA      | Yes                   | Yes                | Yes                  |
| rs2574943  | chr10      | 51695173         | 0         | 20            | 0           | 0         | 21            | 0           | 0         | 23            | 0           | LOC728532    | Yes                   | Yes                | Yes                  |

|            |       |           |      |      |    |      |      |    |      |      |    |              |     |     |     |
|------------|-------|-----------|------|------|----|------|------|----|------|------|----|--------------|-----|-----|-----|
| rs1042665  | chr5  | 137930238 | 33   | 30   | 0  | 13   | 38   | 0  | 34   | 50   | 0  | SNORD63      | No  | Yes | No  |
| rs2794041  | chr1  | 143823777 | 39   | 0    | 0  | 11   | 0    | 0  | 39   | 0    | 0  | SEC22B       | Yes | No  | Yes |
| rs2223477  | chr1  | 169575456 | 0    | 11   | 0  | 0    | 10   | 0  | 0    | 30   | 0  | TOP1P1       | No  | No  | Yes |
| rs12441946 | chr15 | 70978916  | 1    | 0    | 0  | 0    | 1    | 0  | 1    | 35   | 0  | LOC729686    | No  | No  | Yes |
| rs11986385 | chr8  | 30094837  | 477  | 0    | 0  | 26   | 0    | 1  | 470  | 0    | 1  | LOC648729    | Yes | Yes | Yes |
| rs1803621  | chr12 | 6517370   | 2694 | 1690 | 18 | 2269 | 1695 | 21 | 2705 | 2541 | 18 | LOC100133042 | Yes | Yes | No  |
| rs9509472  | chr13 | 20433586  | 29   | 3    | 0  | 1    | 1    | 2  | 37   | 21   | 0  | LOC440125    | Yes | No  | No  |
| rs7768     | chr10 | 120917783 | 16   | 37   | 0  | 8    | 37   | 0  | 16   | 38   | 0  | PRDX3        | No  | Yes | No  |
| rs6792846  | chr3  | 134790181 | 23   | 1    | 0  | 14   | 1    | 0  | 23   | 5    | 0  | CDV3         | Yes | No  | Yes |
| rs525911   | chr17 | 38065445  | 2    | 1    | 0  | 1    | 1    | 0  | 2    | 19   | 0  | TUBG2        | No  | No  | Yes |
| rs7309149  | chr12 | 12895367  | 53   | 1    | 1  | 31   | 1    | 1  | 73   | 0    | 0  | RPS6P1       | Yes | Yes | Yes |
| rs1051470  | chr12 | 117067615 | 44   | 20   | 0  | 40   | 19   | 0  | 43   | 32   | 0  | PEBP1        | Yes | No  | No  |
| rs4791596  | chr17 | 14549410  | 991  | 1    | 10 | 6    | 1    | 9  | 988  | 3    | 13 | LOC388339    | Yes | No  | Yes |
| rs1736924  | chr6  | 29800990  | 89   | 30   | 0  | 80   | 28   | 1  | 90   | 89   | 0  | HLA-F        | Yes | Yes | No  |
| rs7214234  | chr17 | 1708330   | 23   | 0    | 0  | 11   | 0    | 0  | 25   | 0    | 0  | LOC642502    | Yes | No  | Yes |
| rs6875717  | chr5  | 92629704  | 0    | 2    | 0  | 0    | 2    | 0  | 0    | 20   | 0  | LOC391811    | No  | No  | Yes |
| rs273259   | chr1  | 78866406  | 10   | 30   | 1  | 10   | 30   | 1  | 10   | 31   | 1  | IFI44L       | No  | No  | Yes |
| rs2731202  | chr14 | 106106026 | 44   | 0    | 0  | 38   | 0    | 0  | 44   | 0    | 0  | IGHV5-51     | Yes | Yes | Yes |
| rs9273655  | chr6  | 32737187  | 182  | 2    | 3  | 164  | 2    | 3  | 181  | 2    | 2  | HLA-DQB1     | Yes | Yes | Yes |
| rs1049230  | chr19 | 6702281   | 22   | 5    | 2  | 20   | 5    | 2  | 22   | 10   | 2  | TRIP10       | Yes | No  | No  |
| rs6682136  | chr1  | 148861639 | 59   | 5    | 1  | 58   | 5    | 1  | 59   | 5    | 1  | ENSA         | Yes | Yes | Yes |
| rs909713   | chrX  | 47547916  | 0    | 12   | 0  | 0    | 13   | 0  | 0    | 20   | 0  | WASF4        | No  | No  | Yes |
| rs916974   | chr12 | 111931395 | 42   | 17   | 2  | 38   | 15   | 2  | 42   | 18   | 2  | OAS2         | Yes | No  | Yes |
| rs17626    | chr19 | 44618361  | 413  | 293  | 16 | 274  | 292  | 16 | 414  | 402  | 15 | RPS16        | Yes | No  | No  |
| rs20583    | chr9  | 33016572  | 26   | 2    | 0  | 20   | 2    | 1  | 26   | 8    | 0  | DNAJA1       | Yes | Yes | Yes |
| rs3759294  | chr12 | 31835958  | 67   | 0    | 0  | 0    | 0    | 0  | 61   | 0    | 0  | LOC440093    | Yes | No  | Yes |
| rs1158     | chr10 | 22865294  | 23   | 2    | 0  | 23   | 2    | 0  | 23   | 5    | 0  | PIP4K2A      | Yes | Yes | Yes |
| rs7578292  | chr2  | 136673203 | 30   | 1    | 0  | 0    | 0    | 0  | 34   | 3    | 0  | LOC389053    | Yes | No  | Yes |
| rs17044594 | chr3  | 18556112  | 60   | 0    | 0  | 49   | 0    | 0  | 58   | 0    | 0  | LOC131185    | Yes | Yes | Yes |
| rs9410092  | chr9  | 140190645 | 0    | 0    | 0  | 0    | 0    | 0  | 0    | 21   | 0  | LOC643224    | No  | No  | Yes |
| rs2734945  | chr6  | 29963924  | 169  | 1    | 0  | 27   | 1    | 0  | 169  | 2    | 0  | HLA-H        | Yes | Yes | Yes |
| rs7404     | chr5  | 133335760 | 64   | 34   | 0  | 42   | 33   | 0  | 65   | 43   | 0  | VDAC1        | Yes | No  | No  |
| rs17008716 | chr4  | 165338000 | 47   | 0    | 3  | 8    | 0    | 3  | 52   | 0    | 3  | LOC646954    | Yes | No  | Yes |
| rs3888051  | chr12 | 62503257  | 81   | 0    | 0  | 5    | 0    | 1  | 87   | 0    | 0  | LOC341315    | Yes | No  | Yes |
| rs6568     | chr2  | 127170700 | 32   | 10   | 0  | 30   | 10   | 0  | 32   | 12   | 0  | LOC100130248 | Yes | Yes | No  |
| rs17459    | chr1  | 74944339  | 28   | 4    | 1  | 28   | 4    | 1  | 28   | 4    | 1  | CRYZ         | Yes | Yes | Yes |
| rs1058026  | chr6  | 31429664  | 399  | 302  | 2  | 227  | 292  | 3  | 410  | 321  | 3  | HLA-B        | Yes | No  | Yes |
| rs2009646  | chr5  | 108148857 | 1    | 173  | 1  | 0    | 174  | 1  | 1    | 365  | 1  | LOC643534    | Yes | Yes | Yes |
| rs7205     | chrX  | 1468324   | 111  | 81   | 2  | 4    | 98   | 2  | 122  | 186  | 2  | SLC25A6      | No  | Yes | Yes |
| rs2814966  | chr6  | 34820210  | 121  | 0    | 0  | 6    | 0    | 0  | 130  | 0    | 0  | LOC646785    | Yes | No  | Yes |
| rs2230659  | chr1  | 45851471  | 36   | 9    | 0  | 34   | 11   | 0  | 36   | 17   | 0  | NASP         | Yes | Yes | No  |
| rs1136853  | chr11 | 310805    | 10   | 29   | 0  | 6    | 29   | 0  | 10   | 30   | 0  | IFITM3       | No  | Yes | No  |

|                   |      |           |     |    |   |     |    |    |     |    |    |           |     |     |     |
|-------------------|------|-----------|-----|----|---|-----|----|----|-----|----|----|-----------|-----|-----|-----|
| <b>rs11953084</b> | chr5 | 177415300 | 187 | 0  | 9 | 116 | 0  | 10 | 202 | 1  | 12 | LOC653314 | Yes | Yes | Yes |
| <b>rs2430028</b>  | chr7 | 122108911 | 14  | 0  | 0 | 2   | 0  | 0  | 24  | 0  | 0  | LOC645979 | No  | No  | Yes |
| <b>rs16858473</b> | chr3 | 185350316 | 104 | 0  | 2 | 0   | 0  | 3  | 99  | 0  | 3  | LOC440991 | Yes | No  | Yes |
| <b>rs7417535</b>  | chr1 | 16006574  | 0   | 14 | 1 | 1   | 10 | 1  | 1   | 33 | 1  | LOC440567 | No  | No  | Yes |

**Table S8.** Comparison of the three mapping methods at each locus that was significant at 1% FDR in at least one out of the three methods for individual GM19239. In most loci, the enhanced reference approach was able to map the largest number of reference and non-reference reads.

| SNP ID            | Chromosome | Position (hg 18) | Unaltered |               |             | Masked    |               |             | Enhanced  |               |             | Gene         | Unaltered Significant | Masked Significant | Enhanced Significant |
|-------------------|------------|------------------|-----------|---------------|-------------|-----------|---------------|-------------|-----------|---------------|-------------|--------------|-----------------------|--------------------|----------------------|
|                   |            |                  | Ref Reads | Non-Ref Reads | Other Reads | Ref Reads | Non-Ref Reads | Other Reads | Ref Reads | Non-Ref Reads | Other Reads |              |                       |                    |                      |
| <b>rs10250</b>    | chr19      | 4052062          | 17        | 16            | 1           | 3         | 21            | 0           | 14        | 37            | 1           | MAP2K2       | No                    | Yes                | Yes                  |
| <b>rs7662486</b>  | chr4       | 113928795        | 50        | 0             | 2           | 3         | 0             | 0           | 64        | 0             | 0           | LOC441034    | Yes                   | No                 | Yes                  |
| <b>rs1049455</b>  | chr10      | 103910465        | 19        | 4             | 0           | 19        | 4             | 0           | 19        | 4             | 0           | NOLC1        | Yes                   | Yes                | Yes                  |
| <b>rs10031608</b> | chr4       | 12948262         | 55        | 0             | 0           | 25        | 0             | 0           | 48        | 0             | 0           | HSP90AB2P    | Yes                   | Yes                | Yes                  |
| <b>rs6591717</b>  | chr11      | 62091484         | 322       | 67            | 3           | 230       | 101           | 3           | 315       | 236           | 3           | EEF1G        | Yes                   | Yes                | Yes                  |
| <b>rs8177832</b>  | chr22      | 37807512         | 4         | 24            | 0           | 4         | 24            | 0           | 4         | 24            | 0           | APOBEC3G     | Yes                   | Yes                | Yes                  |
| <b>rs1807676</b>  | chr22      | 25613521         | 0         | 1             | 0           | 0         | 1             | 0           | 0         | 101           | 0           | LOC100130624 | No                    | No                 | Yes                  |
| <b>rs4792757</b>  | chr17      | 16461158         | 14        | 0             | 0           | 1         | 0             | 0           | 22        | 0             | 0           | LOC644422    | No                    | No                 | Yes                  |
| <b>rs3170545</b>  | chr19      | 55128527         | 9         | 39            | 0           | 9         | 39            | 0           | 9         | 40            | 0           | ATF5         | Yes                   | Yes                | Yes                  |
| <b>rs4765775</b>  | chr12      | 4284387          | 46        | 19            | 0           | 46        | 19            | 0           | 46        | 19            | 0           | CCND2        | Yes                   | Yes                | Yes                  |
| <b>rs14408</b>    | chr11      | 298314           | 48        | 1             | 0           | 15        | 1             | 0           | 64        | 52            | 1           | IFITM2       | Yes                   | No                 | No                   |
| <b>rs17014852</b> | chr2       | 127537677        | 48        | 0             | 0           | 44        | 0             | 0           | 48        | 0             | 0           | BIN1         | Yes                   | Yes                | Yes                  |
| <b>rs13296</b>    | chr6       | 44326098         | 230       | 69            | 0           | 165       | 76            | 0           | 231       | 162           | 0           | HSP90AB1     | Yes                   | Yes                | Yes                  |
| <b>rs2228064</b>  | chr10      | 45198056         | 4         | 19            | 1           | 4         | 19            | 1           | 4         | 19            | 1           | ALOX5        | No                    | Yes                | Yes                  |
| <b>rs13306758</b> | chr1       | 43165406         | 31        | 0             | 0           | 31        | 0             | 0           | 31        | 0             | 0           | SLC2A1       | Yes                   | Yes                | Yes                  |
| <b>rs7662013</b>  | chr4       | 174791881        | 0         | 18            | 0           | 0         | 14            | 0           | 0         | 171           | 0           | LOC100128266 | No                    | No                 | Yes                  |
| <b>rs4950386</b>  | chr1       | 145142175        | 0         | 3             | 0           | 0         | 3             | 0           | 0         | 26            | 0           | LOC644131    | No                    | No                 | Yes                  |
| <b>rs1051336</b>  | chr6       | 32520570         | 445       | 207           | 1           | 410       | 207           | 1           | 448       | 293           | 2           | HLA-DRA      | Yes                   | Yes                | Yes                  |
| <b>rs631045</b>   | chr1       | 78330102         | 0         | 12            | 0           | 0         | 12            | 0           | 0         | 35            | 1           | LOC729768    | No                    | No                 | Yes                  |
| <b>rs4845</b>     | chr1       | 148547174        | 34        | 42            | 1           | 6         | 26            | 1           | 36        | 46            | 1           | MRPS21       | No                    | Yes                | No                   |
| <b>rs3087615</b>  | chr7       | 102739359        | 26        | 7             | 1           | 26        | 7             | 1           | 26        | 7             | 1           | PMPCB        | Yes                   | Yes                | Yes                  |
| <b>rs11953029</b> | chr5       | 177415790        | 184       | 2             | 1           | 1         | 2             | 3           | 198       | 4             | 2           | LOC653314    | Yes                   | No                 | Yes                  |
| <b>rs6677535</b>  | chr1       | 40371584         | 390       | 0             | 0           | 254       | 0             | 0           | 393       | 0             | 0           | LOC728602    | Yes                   | Yes                | Yes                  |
| <b>rs2848622</b>  | chr11      | 57100600         | 187       | 0             | 0           | 7         | 1             | 0           | 206       | 1             | 0           | LOC390183    | Yes                   | No                 | Yes                  |
| <b>rs7927338</b>  | chr11      | 93561259         | 17        | 0             | 0           | 2         | 0             | 0           | 20        | 0             | 0           | LOC729494    | No                    | No                 | Yes                  |
| <b>rs4726719</b>  | chr7       | 143975161        | 562       | 0             | 3           | 1         | 0             | 5           | 575       | 0             | 2           | LOC100132804 | Yes                   | No                 | Yes                  |
| <b>rs11831812</b> | chr12      | 4077714          | 0         | 1             | 0           | 0         | 1             | 0           | 0         | 32            | 0           | LOC399988    | No                    | No                 | Yes                  |
| <b>rs1042448</b>  | chr6       | 33162320         | 57        | 2             | 0           | 50        | 2             | 0           | 57        | 61            | 0           | RPL32P1      | Yes                   | Yes                | No                   |
| <b>rs9276436</b>  | chr6       | 32822061         | 117       | 1             | 1           | 17        | 1             | 1           | 127       | 1             | 0           | HLA-DQA2     | Yes                   | No                 | Yes                  |



|            |       |           |     |     |   |     |     |   |     |     |   |              |     |     |     |
|------------|-------|-----------|-----|-----|---|-----|-----|---|-----|-----|---|--------------|-----|-----|-----|
| rs2574943  | chr10 | 51695173  | 0   | 24  | 0 | 0   | 26  | 0 | 0   | 35  | 0 | LOC728532    | Yes | Yes | Yes |
| rs1997     | chr2  | 42431310  | 24  | 2   | 0 | 19  | 2   | 0 | 24  | 2   | 0 | COX7A2L      | Yes | Yes | Yes |
| rs1042665  | chr5  | 137930238 | 50  | 49  | 0 | 19  | 46  | 0 | 50  | 62  | 0 | SNORD63      | No  | Yes | No  |
| rs12441946 | chr15 | 70978916  | 0   | 0   | 0 | 0   | 0   | 1 | 0   | 26  | 1 | LOC729686    | No  | No  | Yes |
| rs17101478 | chr14 | 23683279  | 128 | 118 | 0 | 34  | 120 | 0 | 137 | 142 | 0 | PSME2        | No  | Yes | No  |
| rs2223477  | chr1  | 169575456 | 1   | 24  | 0 | 1   | 24  | 0 | 1   | 52  | 0 | TOP1P1       | Yes | Yes | Yes |
| rs11986385 | chr8  | 30094837  | 227 | 0   | 0 | 11  | 0   | 0 | 219 | 0   | 0 | LOC648729    | Yes | No  | Yes |
| rs6570     | chr21 | 45130540  | 51  | 22  | 0 | 51  | 22  | 0 | 51  | 22  | 0 | ITGB2        | Yes | Yes | Yes |
| rs9509472  | chr13 | 20433586  | 45  | 2   | 0 | 1   | 1   | 1 | 36  | 15  | 0 | LOC440125    | Yes | No  | No  |
| rs630245   | chr1  | 78330252  | 29  | 0   | 0 | 18  | 0   | 0 | 29  | 0   | 0 | LOC729768    | Yes | No  | Yes |
| rs4000303  | chr1  | 96686353  | 1   | 23  | 0 | 0   | 26  | 1 | 0   | 43  | 3 | LOC440595    | Yes | Yes | Yes |
| rs17627    | chr19 | 44615792  | 467 | 530 | 4 | 459 | 540 | 4 | 469 | 630 | 5 | RPS16        | No  | No  | Yes |
| rs10947623 | chr6  | 36750814  | 42  | 0   | 0 | 15  | 0   | 0 | 40  | 0   | 0 | LOC389386    | Yes | No  | Yes |
| rs8647     | chr19 | 55128792  | 10  | 79  | 1 | 10  | 79  | 1 | 10  | 81  | 1 | ATF5         | Yes | Yes | Yes |
| rs4791596  | chr17 | 14549410  | 729 | 1   | 4 | 12  | 1   | 5 | 706 | 1   | 5 | LOC388339    | Yes | No  | Yes |
| rs1736924  | chr6  | 29800990  | 1   | 35  | 0 | 0   | 37  | 1 | 0   | 124 | 0 | HLA-F        | Yes | Yes | Yes |
| rs2071888  | chr6  | 33380833  | 56  | 25  | 0 | 55  | 25  | 0 | 56  | 26  | 0 | TAPBP        | Yes | Yes | Yes |
| rs2428512  | chr6  | 29964309  | 180 | 1   | 0 | 11  | 1   | 3 | 200 | 2   | 1 | HLA-H        | Yes | No  | Yes |
| rs2089910  | chr11 | 1830980   | 223 | 0   | 1 | 219 | 0   | 1 | 223 | 0   | 1 | LSP1         | Yes | Yes | Yes |
| rs7214234  | chr17 | 1708330   | 35  | 0   | 0 | 16  | 0   | 0 | 36  | 0   | 0 | LOC642502    | Yes | No  | Yes |
| rs10266655 | chr7  | 24705083  | 33  | 12  | 0 | 33  | 12  | 0 | 33  | 12  | 0 | DFNA5        | Yes | No  | Yes |
| rs4518636  | chr8  | 100973453 | 23  | 0   | 0 | 10  | 0   | 0 | 22  | 20  | 0 | COX6C        | Yes | No  | No  |
| rs2488896  | chr1  | 164513043 | 0   | 32  | 0 | 0   | 32  | 0 | 0   | 47  | 0 | LOC284685    | Yes | Yes | Yes |
| rs2731202  | chr14 | 106106026 | 607 | 9   | 4 | 471 | 9   | 4 | 610 | 17  | 4 | IGHV5-51     | Yes | Yes | Yes |
| rs2071461  | chr11 | 11330536  | 0   | 14  | 0 | 0   | 14  | 0 | 0   | 32  | 0 | CSNK2A1P     | No  | No  | Yes |
| rs7695     | chr1  | 154413950 | 11  | 44  | 0 | 11  | 44  | 0 | 11  | 44  | 0 | SEMA4A       | Yes | Yes | Yes |
| rs3759294  | chr12 | 31835958  | 49  | 1   | 0 | 0   | 1   | 0 | 38  | 1   | 0 | LOC440093    | Yes | No  | Yes |
| rs1158     | chr10 | 22865294  | 23  | 3   | 0 | 23  | 3   | 0 | 23  | 8   | 0 | PIP4K2A      | Yes | Yes | No  |
| rs7578292  | chr2  | 136673203 | 38  | 0   | 0 | 0   | 1   | 0 | 35  | 1   | 0 | LOC389053    | Yes | No  | Yes |
| rs7546434  | chr1  | 145142963 | 0   | 1   | 0 | 0   | 3   | 0 | 0   | 26  | 0 | LOC644131    | No  | No  | Yes |
| rs14105    | chr13 | 27137970  | 17  | 48  | 0 | 16  | 46  | 0 | 17  | 48  | 0 | POLR1D       | Yes | Yes | Yes |
| rs9410092  | chr9  | 140190645 | 1   | 1   | 0 | 1   | 0   | 0 | 1   | 45  | 0 | LOC643224    | No  | No  | Yes |
| rs2734945  | chr6  | 29963924  | 77  | 2   | 0 | 11  | 2   | 0 | 76  | 2   | 0 | HLA-H        | Yes | No  | Yes |
| rs7404     | chr5  | 133335760 | 90  | 18  | 2 | 48  | 19  | 2 | 90  | 45  | 2 | VDAC1        | Yes | Yes | Yes |
| rs6568     | chr2  | 127170700 | 23  | 6   | 0 | 21  | 6   | 0 | 23  | 7   | 0 | LOC100130248 | Yes | No  | No  |
| rs2589529  | chr15 | 33317322  | 1   | 34  | 0 | 1   | 30  | 0 | 1   | 60  | 0 | LOC723972    | Yes | Yes | Yes |
| rs7205     | chrX  | 1468324   | 79  | 102 | 3 | 3   | 90  | 2 | 94  | 186 | 2 | SLC25A6      | No  | Yes | Yes |
| rs16952692 | chr18 | 46693267  | 27  | 0   | 0 | 27  | 0   | 0 | 27  | 0   | 0 | ME2          | Yes | Yes | Yes |
| rs762815   | chr6  | 32837620  | 0   | 12  | 1 | 0   | 12  | 1 | 0   | 50  | 1 | HLA-DQB2     | No  | No  | Yes |
| rs2814966  | chr6  | 34820210  | 103 | 1   | 0 | 4   | 0   | 0 | 103 | 0   | 0 | LOC646785    | Yes | No  | Yes |
| rs3871984  | chr1  | 143823858 | 49  | 0   | 0 | 43  | 0   | 0 | 49  | 0   | 0 | SEC22B       | Yes | Yes | Yes |
| rs2230659  | chr1  | 45851471  | 29  | 8   | 0 | 23  | 13  | 0 | 29  | 23  | 0 | NASP         | Yes | No  | No  |

|                   |       |           |     |    |    |     |    |    |     |     |    |           |     |     |     |
|-------------------|-------|-----------|-----|----|----|-----|----|----|-----|-----|----|-----------|-----|-----|-----|
| <b>rs1059307</b>  | chr6  | 86444607  | 15  | 90 | 0  | 15  | 90 | 0  | 15  | 92  | 0  | SNORD50B  | Yes | Yes | Yes |
| <b>rs199455</b>   | chr17 | 42154400  | 0   | 6  | 0  | 0   | 5  | 1  | 1   | 168 | 0  | LOC644315 | No  | No  | Yes |
| <b>rs11953084</b> | chr5  | 177415300 | 219 | 2  | 13 | 125 | 2  | 16 | 219 | 2   | 20 | LOC653314 | Yes | Yes | Yes |
| <b>rs2719323</b>  | chr8  | 34300101  | 61  | 1  | 0  | 0   | 1  | 0  | 76  | 3   | 0  | CYCSP3    | Yes | No  | Yes |
| <b>rs7599670</b>  | chr2  | 41900536  | 0   | 0  | 0  | 0   | 0  | 0  | 0   | 21  | 0  | LDHAL3    | No  | No  | Yes |
